# Supplementary material for: Hypoxic conditions affect transcriptome of endometrial stromal cells in endometriosis and promote TGFBI axis
Source: Front Endocrinol (Lausanne). 2024 Dec 18;15:1465393. doi: 10.3389/fendo.2024.1465393 (PMC11688238; doi:10.3389/fendo.2024.1465393)
Supplement: Supplementary file 2 [file Table1.xlsx]

## Sheet: S1
Supplementary Table S1. Statistically significant DEGs in 5 comparison groups. Eutopic endometrial stromal cells (EuESCs), ectopic endometrial stromal cells (EcESCs). Genes with an absolute log2 fold change |log2FC| > 0.5 and an FDR-adjusted p-value (q-value) < 0.05 were considered as differentially expressed.
1. EcESCs exposed to hypoxia vs EcESCs exposed to normoxia
Gene ID	log2FoldChange	pvalue	padj	Gene name	Gene name description
ENSG00000120708	2.01356	2.05e-06	0.0366401	TGFBI	transforming growth factor beta induced [Source:HGNC Symbol;Acc:HGNC:11771]
2. EuESCs exposed to hypoxia vs EuESCs exposed to normoxia
Gene ID	log2FoldChange	pvalue	padj	Gene name	Gene name description
ENSG00000163466	0.511203	0.00230898	0.031787	ARPC2	actin related protein 2/3 complex subunit 2 [Source:HGNC Symbol;Acc:HGNC:705]
ENSG00000141349	0.516578	0.00152782	0.0271354	G6PC3	glucose-6-phosphatase catalytic subunit 3 [Source:HGNC Symbol;Acc:HGNC:24861]
ENSG00000031698	0.524149	0.00401359	0.0432421	SARS1	seryl-tRNA synthetase 1 [Source:HGNC Symbol;Acc:HGNC:10537]
ENSG00000131236	0.527373	0.00236525	0.0322038	CAP1	cyclase associated actin cytoskeleton regulatory protein 1 [Source:HGNC Symbol;Acc:HGNC:20040]
ENSG00000006282	0.547847	0.0016794	0.0271354	SPATA20	spermatogenesis associated 20 [Source:HGNC Symbol;Acc:HGNC:26125]
ENSG00000100994	0.557138	0.00421327	0.0450021	PYGB	glycogen phosphorylase B [Source:HGNC Symbol;Acc:HGNC:9723]
ENSG00000110047	0.559119	0.00118626	0.0229652	EHD1	EH domain containing 1 [Source:HGNC Symbol;Acc:HGNC:3242]
ENSG00000113758	0.581484	0.00448699	0.0471134	DBN1	drebrin 1 [Source:HGNC Symbol;Acc:HGNC:2695]
ENSG00000168385	0.583764	0.00247741	0.0330055	SEPTIN2	septin 2 [Source:HGNC Symbol;Acc:HGNC:7729]
ENSG00000077549	0.593706	0.000559834	0.0130091	CAPZB	capping actin protein of muscle Z-line subunit beta [Source:HGNC Symbol;Acc:HGNC:1491]
ENSG00000014216	0.594832	0.00027629	0.0100683	CAPN1	calpain 1 [Source:HGNC Symbol;Acc:HGNC:1476]
ENSG00000165915	0.610351	0.00244493	0.0329268	SLC39A13	solute carrier family 39 member 13 [Source:HGNC Symbol;Acc:HGNC:20859]
ENSG00000160752	0.616743	0.00391939	0.0426051	FDPS	farnesyl diphosphate synthase [Source:HGNC Symbol;Acc:HGNC:3631]
ENSG00000197879	0.619135	0.00487608	0.0482409	MYO1C	myosin IC [Source:HGNC Symbol;Acc:HGNC:7597]
ENSG00000122203	0.628412	0.00494478	0.0482409	KIAA1191	KIAA1191 [Source:HGNC Symbol;Acc:HGNC:29209]
ENSG00000163191	0.648455	0.00336778	0.038636	S100A11	S100 calcium binding protein A11 [Source:HGNC Symbol;Acc:HGNC:10488]
ENSG00000175220	0.654044	0.00296716	0.0360422	ARHGAP1	Rho GTPase activating protein 1 [Source:HGNC Symbol;Acc:HGNC:673]
ENSG00000129353	0.658999	0.00187304	0.0279579	SLC44A2	solute carrier family 44 member 2 [Source:HGNC Symbol;Acc:HGNC:17292]
ENSG00000197702	0.679871	4.53626e-05	0.00337921	PARVA	parvin alpha [Source:HGNC Symbol;Acc:HGNC:14652]
ENSG00000106105	0.683143	0.00138562	0.0260119	GARS1	glycyl-tRNA synthetase 1 [Source:HGNC Symbol;Acc:HGNC:4162]
ENSG00000128591	0.683932	0.00162963	0.0271354	FLNC	filamin C [Source:HGNC Symbol;Acc:HGNC:3756]
ENSG00000115866	0.689704	0.00292018	0.0360422	DARS1	aspartyl-tRNA synthetase 1 [Source:HGNC Symbol;Acc:HGNC:2678]
ENSG00000204843	0.692506	0.000922395	0.020408	DCTN1	dynactin subunit 1 [Source:HGNC Symbol;Acc:HGNC:2711]
ENSG00000162704	0.693337	0.00492026	0.0482409	ARPC5	actin related protein 2/3 complex subunit 5 [Source:HGNC Symbol;Acc:HGNC:708]
ENSG00000161203	0.693402	0.00207811	0.0295382	AP2M1	adaptor related protein complex 2 subunit mu 1 [Source:HGNC Symbol;Acc:HGNC:564]
ENSG00000182199	0.700653	4.35165e-06	0.000607879	SHMT2	serine hydroxymethyltransferase 2 [Source:HGNC Symbol;Acc:HGNC:10852]
ENSG00000198467	0.704738	0.00492475	0.0482409	TPM2	tropomyosin 2 [Source:HGNC Symbol;Acc:HGNC:12011]
ENSG00000150991	0.710653	0.00281882	0.0358753	UBC	ubiquitin C [Source:HGNC Symbol;Acc:HGNC:12468]
ENSG00000013364	0.714719	0.000515381	0.0127711	MVP	major vault protein [Source:HGNC Symbol;Acc:HGNC:7531]
ENSG00000026025	0.719574	0.00307067	0.0364293	VIM	vimentin [Source:HGNC Symbol;Acc:HGNC:12692]
ENSG00000071127	0.728367	3.85329e-05	0.00318282	WDR1	WD repeat domain 1 [Source:HGNC Symbol;Acc:HGNC:12754]
ENSG00000058262	0.741	0.00311663	0.0364293	SEC61A1	SEC61 translocon subunit alpha 1 [Source:HGNC Symbol;Acc:HGNC:18276]
ENSG00000167460	0.744578	0.00479215	0.0482409	TPM4	tropomyosin 4 [Source:HGNC Symbol;Acc:HGNC:12013]
ENSG00000023191	0.750654	0.000342679	0.0108866	RNH1	ribonuclease/angiogenin inhibitor 1 [Source:HGNC Symbol;Acc:HGNC:10074]
ENSG00000160789	0.753721	0.000150996	0.00719555	LMNA	lamin A/C [Source:HGNC Symbol;Acc:HGNC:6636]
ENSG00000108518	0.756658	0.00153713	0.0271354	PFN1	profilin 1 [Source:HGNC Symbol;Acc:HGNC:8881]
ENSG00000143774	0.764071	0.00170314	0.0271354	GUK1	guanylate kinase 1 [Source:HGNC Symbol;Acc:HGNC:4693]
ENSG00000102024	0.774216	0.000290277	0.0101378	PLS3	plastin 3 [Source:HGNC Symbol;Acc:HGNC:9091]
ENSG00000182718	0.778384	7.71832e-05	0.00436527	ANXA2	annexin A2 [Source:HGNC Symbol;Acc:HGNC:537]
ENSG00000164111	0.784108	0.000106249	0.0054851	ANXA5	annexin A5 [Source:HGNC Symbol;Acc:HGNC:543]
ENSG00000072682	0.786485	0.00340642	0.0387207	P4HA2	prolyl 4-hydroxylase subunit alpha 2 [Source:HGNC Symbol;Acc:HGNC:8547]
ENSG00000162909	0.789992	0.00106889	0.0218995	CAPN2	calpain 2 [Source:HGNC Symbol;Acc:HGNC:1479]
ENSG00000177469	0.79399	0.00023064	0.00893008	CAVIN1	caveolae associated protein 1 [Source:HGNC Symbol;Acc:HGNC:9688]
ENSG00000136240	0.797863	0.00112218	0.0224256	KDELR2	KDEL endoplasmic reticulum protein retention receptor 2 [Source:HGNC Symbol;Acc:HGNC:6305]
ENSG00000158710	0.802731	0.00173177	0.0271604	TAGLN2	transgelin 2 [Source:HGNC Symbol;Acc:HGNC:11554]
ENSG00000140682	0.815878	0.000470576	0.0125987	TGFB1I1	transforming growth factor beta 1 induced transcript 1 [Source:HGNC Symbol;Acc:HGNC:11767]
ENSG00000075624	0.816497	0.000388687	0.0111996	ACTB	actin beta [Source:HGNC Symbol;Acc:HGNC:132]
ENSG00000130402	0.818113	0.000184346	0.00815729	ACTN4	actinin alpha 4 [Source:HGNC Symbol;Acc:HGNC:166]
ENSG00000092820	0.835384	0.00252986	0.0333457	EZR	ezrin [Source:HGNC Symbol;Acc:HGNC:12691]
ENSG00000134590	0.83815	0.000438014	0.01206	RTL8C	retrotransposon Gag like 8C [Source:HGNC Symbol;Acc:HGNC:2569]
ENSG00000101335	0.843174	0.00518803	0.049561	MYL9	myosin light chain 9 [Source:HGNC Symbol;Acc:HGNC:15754]
ENSG00000164733	0.845224	0.00469783	0.0482409	CTSB	cathepsin B [Source:HGNC Symbol;Acc:HGNC:2527]
ENSG00000079459	0.848159	0.0052001	0.049561	FDFT1	farnesyl-diphosphate farnesyltransferase 1 [Source:HGNC Symbol;Acc:HGNC:3629]
ENSG00000137267	0.851684	0.00135882	0.0259012	TUBB2A	tubulin beta 2A class IIa [Source:HGNC Symbol;Acc:HGNC:12412]
ENSG00000002834	0.85303	0.000227615	0.00893008	LASP1	LIM and SH3 protein 1 [Source:HGNC Symbol;Acc:HGNC:6513]
ENSG00000108828	0.854167	0.00257325	0.0335606	VAT1	vesicle amine transport 1 [Source:HGNC Symbol;Acc:HGNC:16919]
ENSG00000142669	0.856965	0.000380042	0.0111996	SH3BGRL3	SH3 domain binding glutamate rich protein like 3 [Source:HGNC Symbol;Acc:HGNC:15568]
ENSG00000152377	0.859865	0.00180142	0.0275551	SPOCK1	SPARC (osteonectin), cwcv and kazal like domains proteoglycan 1 [Source:HGNC Symbol;Acc:HGNC:11251]
ENSG00000197043	0.864444	0.000433453	0.01206	ANXA6	annexin A6 [Source:HGNC Symbol;Acc:HGNC:544]
ENSG00000176014	0.871018	0.000180646	0.00815729	TUBB6	tubulin beta 6 class V [Source:HGNC Symbol;Acc:HGNC:20776]
ENSG00000233276	0.890396	0.00167023	0.0271354	GPX1	glutathione peroxidase 1 [Source:HGNC Symbol;Acc:HGNC:4553]
ENSG00000197746	0.902117	0.00501904	0.0485827	PSAP	prosaposin [Source:HGNC Symbol;Acc:HGNC:9498]
ENSG00000067560	0.908564	0.00161881	0.0271354	RHOA	ras homolog family member A [Source:HGNC Symbol;Acc:HGNC:667]
ENSG00000049449	0.927691	0.000565694	0.0130091	RCN1	reticulocalbin 1 [Source:HGNC Symbol;Acc:HGNC:9934]
ENSG00000177697	0.928092	0.00209795	0.0295382	CD151	CD151 molecule (Raph blood group) [Source:HGNC Symbol;Acc:HGNC:1630]
ENSG00000116133	0.932085	0.00179169	0.0275551	DHCR24	24-dehydrocholesterol reductase [Source:HGNC Symbol;Acc:HGNC:2859]
ENSG00000149485	0.939437	0.00379389	0.0419699	FADS1	fatty acid desaturase 1 [Source:HGNC Symbol;Acc:HGNC:3574]
ENSG00000155876	0.962541	0.000498621	0.012608	RRAGA	Ras related GTP binding A [Source:HGNC Symbol;Acc:HGNC:16963]
ENSG00000131473	0.96668	0.0030838	0.0364293	ACLY	ATP citrate lyase [Source:HGNC Symbol;Acc:HGNC:115]
ENSG00000114480	0.976914	0.00047947	0.0125987	GBE1	1,4-alpha-glucan branching enzyme 1 [Source:HGNC Symbol;Acc:HGNC:4180]
ENSG00000105281	1.00964	0.00459473	0.0478393	SLC1A5	solute carrier family 1 member 5 [Source:HGNC Symbol;Acc:HGNC:10943]
ENSG00000167996	1.0139	0.000488086	0.0125987	FTH1	ferritin heavy chain 1 [Source:HGNC Symbol;Acc:HGNC:3976]
ENSG00000148180	1.02731	0.00141578	0.0261813	GSN	gelsolin [Source:HGNC Symbol;Acc:HGNC:4620]
ENSG00000185624	1.03025	0.000824255	0.0185682	P4HB	prolyl 4-hydroxylase subunit beta [Source:HGNC Symbol;Acc:HGNC:8548]
ENSG00000135269	1.03201	0.00345543	0.0389207	TES	testin LIM domain protein [Source:HGNC Symbol;Acc:HGNC:14620]
ENSG00000019549	1.03517	0.00103249	0.0218995	SNAI2	snail family transcriptional repressor 2 [Source:HGNC Symbol;Acc:HGNC:11094]
ENSG00000156515	1.03799	0.000379632	0.0111996	HK1	hexokinase 1 [Source:HGNC Symbol;Acc:HGNC:4922]
ENSG00000024422	1.04721	2.40952e-06	0.000597078	EHD2	EH domain containing 2 [Source:HGNC Symbol;Acc:HGNC:3243]
ENSG00000050165	1.06222	0.00167542	0.0271354	DKK3	dickkopf WNT signaling pathway inhibitor 3 [Source:HGNC Symbol;Acc:HGNC:2893]
ENSG00000186340	1.08745	0.00107818	0.0218995	THBS2	thrombospondin 2 [Source:HGNC Symbol;Acc:HGNC:11786]
ENSG00000154277	1.11267	0.00189545	0.0279579	UCHL1	ubiquitin C-terminal hydrolase L1 [Source:HGNC Symbol;Acc:HGNC:12513]
ENSG00000116774	1.11545	0.00294561	0.0360422	OLFML3	olfactomedin like 3 [Source:HGNC Symbol;Acc:HGNC:24956]
ENSG00000150093	1.15826	3.54518e-06	0.000607879	ITGB1	integrin subunit beta 1 [Source:HGNC Symbol;Acc:HGNC:6153]
ENSG00000136156	1.16209	0.00363588	0.0405843	ITM2B	integral membrane protein 2B [Source:HGNC Symbol;Acc:HGNC:6174]
ENSG00000072110	1.17348	0.0010469	0.0218995	ACTN1	actinin alpha 1 [Source:HGNC Symbol;Acc:HGNC:163]
ENSG00000167552	1.1937	0.00021146	0.0087333	TUBA1A	tubulin alpha 1a [Source:HGNC Symbol;Acc:HGNC:20766]
ENSG00000164096	1.21263	1.80037e-05	0.00185889	C4orf3	chromosome 4 open reading frame 3 [Source:HGNC Symbol;Acc:HGNC:19225]
ENSG00000034152	1.23071	0.00333298	0.0385941	MAP2K3	mitogen-activated protein kinase kinase 3 [Source:HGNC Symbol;Acc:HGNC:6843]
ENSG00000105220	1.23842	0.000294562	0.0101378	GPI	glucose-6-phosphate isomerase [Source:HGNC Symbol;Acc:HGNC:4458]
ENSG00000166923	1.25711	0.002684	0.0346404	GREM1	gremlin 1, DAN family BMP antagonist [Source:HGNC Symbol;Acc:HGNC:2001]
ENSG00000164692	1.26755	0.00288379	0.0360422	COL1A2	collagen type I alpha 2 chain [Source:HGNC Symbol;Acc:HGNC:2198]
ENSG00000197747	1.27512	0.00283759	0.0358753	S100A10	S100 calcium binding protein A10 [Source:HGNC Symbol;Acc:HGNC:10487]
ENSG00000111640	1.28138	0.0001384	0.00685911	GAPDH	glyceraldehyde-3-phosphate dehydrogenase [Source:HGNC Symbol;Acc:HGNC:4141]
ENSG00000104765	1.30291	0.00204456	0.029456	BNIP3L	BCL2 interacting protein 3 like [Source:HGNC Symbol;Acc:HGNC:1085]
ENSG00000122884	1.31626	0.000544425	0.0130091	P4HA1	prolyl 4-hydroxylase subunit alpha 1 [Source:HGNC Symbol;Acc:HGNC:8546]
ENSG00000159674	1.31958	0.000373335	0.0111996	SPON2	spondin 2 [Source:HGNC Symbol;Acc:HGNC:11253]
ENSG00000168542	1.32757	2.59415e-05	0.00229582	COL3A1	collagen type III alpha 1 chain [Source:HGNC Symbol;Acc:HGNC:2201]
ENSG00000141959	1.32762	2.02699e-05	0.00193188	PFKL	phosphofructokinase, liver type [Source:HGNC Symbol;Acc:HGNC:8876]
ENSG00000161638	1.33795	2.32969e-07	9.62162e-05	ITGA5	integrin subunit alpha 5 [Source:HGNC Symbol;Acc:HGNC:6141]
ENSG00000134013	1.33914	8.10341e-05	0.00436527	LOXL2	lysyl oxidase like 2 [Source:HGNC Symbol;Acc:HGNC:6666]
ENSG00000108821	1.38075	7.52743e-05	0.00436527	COL1A1	collagen type I alpha 1 chain [Source:HGNC Symbol;Acc:HGNC:2197]
ENSG00000067225	1.42732	3.55713e-06	0.000607879	PKM	pyruvate kinase M1/2 [Source:HGNC Symbol;Acc:HGNC:9021]
ENSG00000145730	1.43604	0.00117363	0.0229652	PAM	peptidylglycine alpha-amidating monooxygenase [Source:HGNC Symbol;Acc:HGNC:8596]
ENSG00000171314	1.45852	0.000270803	0.0100683	PGAM1	phosphoglycerate mutase 1 [Source:HGNC Symbol;Acc:HGNC:8888]
ENSG00000113739	1.46192	0.0018512	0.0279579	STC2	stanniocalcin 2 [Source:HGNC Symbol;Acc:HGNC:11374]
ENSG00000113083	1.46968	3.5316e-11	4.37565e-08	LOX	lysyl oxidase [Source:HGNC Symbol;Acc:HGNC:6664]
ENSG00000074800	1.47521	7.50039e-05	0.00436527	ENO1	enolase 1 [Source:HGNC Symbol;Acc:HGNC:3350]
ENSG00000111669	1.6678	4.63652e-05	0.00337921	TPI1	triosephosphate isomerase 1 [Source:HGNC Symbol;Acc:HGNC:12009]
ENSG00000142871	1.75706	0.000310935	0.0101903	CCN1	cellular communication network factor 1 [Source:HGNC Symbol;Acc:HGNC:2654]
ENSG00000067057	1.8063	1.29552e-08	8.02573e-06	PFKP	phosphofructokinase, platelet [Source:HGNC Symbol;Acc:HGNC:8878]
ENSG00000134333	1.93677	1.7109e-05	0.00185889	LDHA	lactate dehydrogenase A [Source:HGNC Symbol;Acc:HGNC:6535]
ENSG00000117394	2.02179	5.91911e-05	0.00407432	SLC2A1	solute carrier family 2 member 1 [Source:HGNC Symbol;Acc:HGNC:11005]
ENSG00000102144	2.08127	1.19492e-05	0.0014805	PGK1	phosphoglycerate kinase 1 [Source:HGNC Symbol;Acc:HGNC:8896]
ENSG00000120708	2.15282	3.9915e-07	0.000123637	TGFBI	transforming growth factor beta induced [Source:HGNC Symbol;Acc:HGNC:11771]
ENSG00000099194	2.47546	4.41558e-06	0.000607879	SCD	stearoyl-CoA desaturase [Source:HGNC Symbol;Acc:HGNC:10571]
ENSG00000176171	2.9005	7.81197e-05	0.00436527	BNIP3	BCL2 interacting protein 3 [Source:HGNC Symbol;Acc:HGNC:1084]
3. EcESCs exposed to hypoxia vs EuESCs exposed to hypoxia
Gene ID	log2FoldChange	pvalue	padj	Gene name	Gene name description
ENSG00000167755	-8.78856	1.93381e-05	0.0355976	KLK6	kallikrein related peptidase 6 [Source:HGNC Symbol;Acc:HGNC:6367]
ENSG00000167244	-5.3314	2.3378e-06	0.00537927	IGF2	insulin like growth factor 2 [Source:HGNC Symbol;Acc:HGNC:5466]
ENSG00000011465	-3.38818	5.53666e-05	0.0455249	DCN	decorin [Source:HGNC Symbol;Acc:HGNC:2705]
ENSG00000134321	-3.24105	9.57863e-05	0.047053	RSAD2	radical S-adenosyl methionine domain containing 2 [Source:HGNC Symbol;Acc:HGNC:30908]
ENSG00000130513	-2.5482	1.72454e-06	0.00529087	GDF15	growth differentiation factor 15 [Source:HGNC Symbol;Acc:HGNC:30142]
ENSG00000170962	-2.15374	2.90594e-05	0.0382089	PDGFD	platelet derived growth factor D [Source:HGNC Symbol;Acc:HGNC:30620]
ENSG00000168528	-2.11604	7.82086e-05	0.047053	SERINC2	serine incorporator 2 [Source:HGNC Symbol;Acc:HGNC:23231]
ENSG00000135916	-1.57652	6.57284e-05	0.0455249	ITM2C	integral membrane protein 2C [Source:HGNC Symbol;Acc:HGNC:6175]
ENSG00000090520	-1.37219	7.68803e-07	0.00482926	DNAJB11	DnaJ heat shock protein family (Hsp40) member B11 [Source:HGNC Symbol;Acc:HGNC:14889]
ENSG00000007384	-1.35157	3.98345e-05	0.0438774	RHBDF1	rhomboid 5 homolog 1 [Source:HGNC Symbol;Acc:HGNC:20561]
ENSG00000171222	-1.33022	6.50466e-05	0.0455249	SCAND1	SCAN domain containing 1 [Source:HGNC Symbol;Acc:HGNC:10566]
ENSG00000168734	-1.32059	8.63194e-05	0.047053	PKIG	cAMP-dependent protein kinase inhibitor gamma [Source:HGNC Symbol;Acc:HGNC:9019]
ENSG00000157593	-0.856069	4.95391e-05	0.0455249	SLC35B2	solute carrier family 35 member B2 [Source:HGNC Symbol;Acc:HGNC:16872]
ENSG00000182551	-0.815952	9.0407e-05	0.047053	ADI1	acireductone dioxygenase 1 [Source:HGNC Symbol;Acc:HGNC:30576]
ENSG00000105677	-0.752486	0.000100997	0.047053	TMEM147	transmembrane protein 147 [Source:HGNC Symbol;Acc:HGNC:30414]
ENSG00000188994	0.646953	6.92469e-05	0.0455249	ZNF292	zinc finger protein 292 [Source:HGNC Symbol;Acc:HGNC:18410]
ENSG00000112144	0.976268	0.000102245	0.047053	CILK1	ciliogenesis associated kinase 1 [Source:HGNC Symbol;Acc:HGNC:21219]
ENSG00000168286	1.28288	4.29049e-05	0.0438774	THAP11	THAP domain containing 11 [Source:HGNC Symbol;Acc:HGNC:23194]
ENSG00000120708	1.78885	2.46675e-05	0.03784	TGFBI	transforming growth factor beta induced [Source:HGNC Symbol;Acc:HGNC:11771]
ENSG00000178776	3.39971	1.04938e-06	0.00482926	C5orf46	chromosome 5 open reading frame 46 [Source:HGNC Symbol;Acc:HGNC:33768]
4. EcESCs exposed to normoxia vs EuESCs exposed to normoxia
Gene ID	log2FoldChange	pvalue	padj	Gene name	Gene name description
ENSG00000105855	-2.31401	0.000343336	0.137663	ITGB8	integrin subunit beta 8 [Source:HGNC Symbol;Acc:HGNC:6163]
ENSG00000204434	-1.97576	0.00224077	0.308324	POTEKP	POTE ankyrin domain family member K, pseudogene [Source:HGNC Symbol;Acc:HGNC:30182]
ENSG00000239039	-1.66147	0.0064104	0.479549	SNORD13	small nucleolar RNA, C/D box 13 [Source:HGNC Symbol;Acc:HGNC:32711]
ENSG00000005249	-1.58376	0.00584269	0.472648	PRKAR2B	protein kinase cAMP-dependent type II regulatory subunit beta [Source:HGNC Symbol;Acc:HGNC:9392]
ENSG00000157933	-1.45825	0.00477579	0.465026	SKI	SKI proto-oncogene [Source:HGNC Symbol;Acc:HGNC:10896]
ENSG00000287287	-1.4541	0.00644953	0.479549	None	novel transcript, antisense to RUSC2
ENSG00000108176	-1.45018	0.00103043	0.224879	DNAJC12	DnaJ heat shock protein family (Hsp40) member C12 [Source:HGNC Symbol;Acc:HGNC:28908]
ENSG00000225630	-1.39886	0.00026885	0.1341	MTND2P28	MT-ND2 pseudogene 28 [Source:HGNC Symbol;Acc:HGNC:42129]
ENSG00000197959	-1.35306	0.00119589	0.233711	DNM3	dynamin 3 [Source:HGNC Symbol;Acc:HGNC:29125]
ENSG00000198794	-1.33771	0.00380683	0.427201	SCAMP5	secretory carrier membrane protein 5 [Source:HGNC Symbol;Acc:HGNC:30386]
ENSG00000229833	-1.33022	0.00161557	0.26861	PET100	PET100 cytochrome c oxidase chaperone [Source:HGNC Symbol;Acc:HGNC:40038]
ENSG00000163964	-1.13186	0.00218557	0.307806	PIGX	phosphatidylinositol glycan anchor biosynthesis class X [Source:HGNC Symbol;Acc:HGNC:26046]
ENSG00000135441	-1.06351	0.00513411	0.467928	BLOC1S1	biogenesis of lysosomal organelles complex 1 subunit 1 [Source:HGNC Symbol;Acc:HGNC:4200]
ENSG00000152990	-0.935961	0.000950442	0.224879	ADGRA3	adhesion G protein-coupled receptor A3 [Source:HGNC Symbol;Acc:HGNC:13839]
ENSG00000136859	-0.927838	0.0052556	0.467928	ANGPTL2	angiopoietin like 2 [Source:HGNC Symbol;Acc:HGNC:490]
ENSG00000047346	-0.893611	0.00462438	0.465026	FAM214A	family with sequence similarity 214 member A [Source:HGNC Symbol;Acc:HGNC:25609]
ENSG00000164631	-0.837687	0.0039095	0.429363	ZNF12	zinc finger protein 12 [Source:HGNC Symbol;Acc:HGNC:12902]
ENSG00000153006	-0.740288	0.00137645	0.24913	SREK1IP1	SREK1 interacting protein 1 [Source:HGNC Symbol;Acc:HGNC:26716]
ENSG00000139116	-0.738599	0.00382791	0.427201	KIF21A	kinesin family member 21A [Source:HGNC Symbol;Acc:HGNC:19349]
ENSG00000144357	-0.669328	0.00261029	0.335998	UBR3	ubiquitin protein ligase E3 component n-recognin 3 [Source:HGNC Symbol;Acc:HGNC:30467]
ENSG00000113558	-0.528772	0.00538753	0.467928	SKP1	S-phase kinase associated protein 1 [Source:HGNC Symbol;Acc:HGNC:10899]
ENSG00000197702	0.520247	0.00177596	0.276209	PARVA	parvin alpha [Source:HGNC Symbol;Acc:HGNC:14652]
ENSG00000124942	0.538198	0.003197	0.383476	AHNAK	AHNAK nucleoprotein [Source:HGNC Symbol;Acc:HGNC:347]
ENSG00000177731	0.548863	0.00180369	0.27682	FLII	FLII actin remodeling protein [Source:HGNC Symbol;Acc:HGNC:3750]
ENSG00000240356	0.563846	0.00167189	0.271773	RPL23AP7	ribosomal protein L23a pseudogene 7 [Source:HGNC Symbol;Acc:HGNC:17336]
ENSG00000072135	0.585031	0.00672613	0.485857	PTPN18	protein tyrosine phosphatase non-receptor type 18 [Source:HGNC Symbol;Acc:HGNC:9649]
ENSG00000102024	0.601222	0.00485586	0.465026	PLS3	plastin 3 [Source:HGNC Symbol;Acc:HGNC:9091]
ENSG00000175105	0.609426	0.00685641	0.485857	ZNF654	zinc finger protein 654 [Source:HGNC Symbol;Acc:HGNC:25612]
ENSG00000125458	0.628119	0.000304843	0.137663	NT5C	5', 3'-nucleotidase, cytosolic [Source:HGNC Symbol;Acc:HGNC:17144]
ENSG00000143641	0.629157	0.00624436	0.473109	GALNT2	polypeptide N-acetylgalactosaminyltransferase 2 [Source:HGNC Symbol;Acc:HGNC:4124]
ENSG00000017260	0.654847	0.00550665	0.468978	ATP2C1	ATPase secretory pathway Ca2+ transporting 1 [Source:HGNC Symbol;Acc:HGNC:13211]
ENSG00000291064	0.699275	0.00640975	0.479549	RPL23AP7	ribosomal protein L23a pseudogene 7 [Source:NCBI gene (formerly Entrezgene);Acc:118433]
ENSG00000172081	0.69973	1.13061e-05	0.0225576	MOB3A	MOB kinase activator 3A [Source:HGNC Symbol;Acc:HGNC:29802]
ENSG00000150093	0.712333	0.00435074	0.460909	ITGB1	integrin subunit beta 1 [Source:HGNC Symbol;Acc:HGNC:6153]
ENSG00000044090	0.736656	0.000363708	0.137663	CUL7	cullin 7 [Source:HGNC Symbol;Acc:HGNC:21024]
ENSG00000089159	0.737294	0.00558879	0.468978	PXN	paxillin [Source:HGNC Symbol;Acc:HGNC:9718]
ENSG00000177469	0.737628	0.000613266	0.19903	CAVIN1	caveolae associated protein 1 [Source:HGNC Symbol;Acc:HGNC:9688]
ENSG00000112078	0.73767	0.00420998	0.452668	KCTD20	potassium channel tetramerization domain containing 20 [Source:HGNC Symbol;Acc:HGNC:21052]
ENSG00000071575	0.763235	0.00679417	0.485857	TRIB2	tribbles pseudokinase 2 [Source:HGNC Symbol;Acc:HGNC:30809]
ENSG00000196924	0.777072	0.0048946	0.465026	FLNA	filamin A [Source:HGNC Symbol;Acc:HGNC:3754]
ENSG00000107554	0.790795	0.00275618	0.34369	DNMBP	dynamin binding protein [Source:HGNC Symbol;Acc:HGNC:30373]
ENSG00000128591	0.791791	0.000251322	0.130808	FLNC	filamin C [Source:HGNC Symbol;Acc:HGNC:3756]
ENSG00000104812	0.804987	9.76468e-05	0.0779287	GYS1	glycogen synthase 1 [Source:HGNC Symbol;Acc:HGNC:4706]
ENSG00000172380	0.811016	0.00497843	0.467928	GNG12	G protein subunit gamma 12 [Source:HGNC Symbol;Acc:HGNC:19663]
ENSG00000117143	0.813276	0.000836226	0.222455	UAP1	UDP-N-acetylglucosamine pyrophosphorylase 1 [Source:HGNC Symbol;Acc:HGNC:12457]
ENSG00000161638	0.853471	0.000971366	0.224879	ITGA5	integrin subunit alpha 5 [Source:HGNC Symbol;Acc:HGNC:6141]
ENSG00000240184	0.873761	0.00655934	0.484703	PCDHGC3	protocadherin gamma subfamily C, 3 [Source:HGNC Symbol;Acc:HGNC:8716]
ENSG00000168542	0.878471	0.00537501	0.467928	COL3A1	collagen type III alpha 1 chain [Source:HGNC Symbol;Acc:HGNC:2201]
ENSG00000197043	0.881983	0.000327376	0.137663	ANXA6	annexin A6 [Source:HGNC Symbol;Acc:HGNC:544]
ENSG00000144843	0.888753	0.00457641	0.465026	ADPRH	ADP-ribosylarginine hydrolase [Source:HGNC Symbol;Acc:HGNC:269]
ENSG00000133816	0.896381	0.00470246	0.465026	MICAL2	microtubule associated monooxygenase, calponin and LIM domain containing 2 [Source:HGNC Symbol;Acc:HGNC:24693]
ENSG00000131148	0.905508	0.00615931	0.472648	EMC8	ER membrane protein complex subunit 8 [Source:HGNC Symbol;Acc:HGNC:7864]
ENSG00000038427	0.944748	0.00216675	0.307806	VCAN	versican [Source:HGNC Symbol;Acc:HGNC:2464]
ENSG00000019549	0.959173	0.00234235	0.311559	SNAI2	snail family transcriptional repressor 2 [Source:HGNC Symbol;Acc:HGNC:11094]
ENSG00000131473	0.965046	0.00309504	0.378068	ACLY	ATP citrate lyase [Source:HGNC Symbol;Acc:HGNC:115]
ENSG00000152492	0.967798	0.00135139	0.248884	CCDC50	coiled-coil domain containing 50 [Source:HGNC Symbol;Acc:HGNC:18111]
ENSG00000188636	0.968586	0.00108046	0.224879	RTL6	retrotransposon Gag like 6 [Source:HGNC Symbol;Acc:HGNC:13343]
ENSG00000174945	0.989133	0.0059763	0.472648	AMZ1	archaelysin family metallopeptidase 1 [Source:HGNC Symbol;Acc:HGNC:22231]
ENSG00000163359	0.990987	0.00580064	0.472648	COL6A3	collagen type VI alpha 3 chain [Source:HGNC Symbol;Acc:HGNC:2213]
ENSG00000185122	1.00454	0.00597634	0.472648	HSF1	heat shock transcription factor 1 [Source:HGNC Symbol;Acc:HGNC:5224]
ENSG00000164096	1.00619	0.00036799	0.137663	C4orf3	chromosome 4 open reading frame 3 [Source:HGNC Symbol;Acc:HGNC:19225]
ENSG00000135048	1.02062	0.00222466	0.308324	CEMIP2	cell migration inducing hyaluronidase 2 [Source:HGNC Symbol;Acc:HGNC:11869]
ENSG00000113790	1.02454	0.00577451	0.472648	EHHADH	enoyl-CoA hydratase and 3-hydroxyacyl CoA dehydrogenase [Source:HGNC Symbol;Acc:HGNC:3247]
ENSG00000082146	1.02855	0.00200217	0.295901	STRADB	STE20 related adaptor beta [Source:HGNC Symbol;Acc:HGNC:13205]
ENSG00000072786	1.03492	0.000712491	0.222455	STK10	serine/threonine kinase 10 [Source:HGNC Symbol;Acc:HGNC:11388]
ENSG00000163110	1.0459	0.00571723	0.472648	PDLIM5	PDZ and LIM domain 5 [Source:HGNC Symbol;Acc:HGNC:17468]
ENSG00000173210	1.04746	0.00418756	0.452668	ABLIM3	actin binding LIM protein family member 3 [Source:HGNC Symbol;Acc:HGNC:29132]
ENSG00000165996	1.05009	0.00161091	0.26861	HACD1	3-hydroxyacyl-CoA dehydratase 1 [Source:HGNC Symbol;Acc:HGNC:9639]
ENSG00000164930	1.05993	0.00453971	0.465026	FZD6	frizzled class receptor 6 [Source:HGNC Symbol;Acc:HGNC:4044]
ENSG00000119938	1.0668	0.00177663	0.276209	PPP1R3C	protein phosphatase 1 regulatory subunit 3C [Source:HGNC Symbol;Acc:HGNC:9293]
ENSG00000105976	1.06851	2.86426e-05	0.0428601	MET	MET proto-oncogene, receptor tyrosine kinase [Source:HGNC Symbol;Acc:HGNC:7029]
ENSG00000187688	1.07152	0.000866244	0.223412	TRPV2	transient receptor potential cation channel subfamily V member 2 [Source:HGNC Symbol;Acc:HGNC:18082]
ENSG00000253159	1.0926	0.00346793	0.407006	PCDHGA12	protocadherin gamma subfamily A, 12 [Source:HGNC Symbol;Acc:HGNC:8699]
ENSG00000183808	1.10536	0.00681021	0.485857	RBM12B	RNA binding motif protein 12B [Source:HGNC Symbol;Acc:HGNC:32310]
ENSG00000138356	1.13163	0.00525841	0.467928	AOX1	aldehyde oxidase 1 [Source:HGNC Symbol;Acc:HGNC:553]
ENSG00000134516	1.17984	0.0037243	0.427201	DOCK2	dedicator of cytokinesis 2 [Source:HGNC Symbol;Acc:HGNC:2988]
ENSG00000128340	1.1962	0.00258814	0.335998	RAC2	Rac family small GTPase 2 [Source:HGNC Symbol;Acc:HGNC:9802]
ENSG00000113083	1.19659	6.87902e-08	0.000823487	LOX	lysyl oxidase [Source:HGNC Symbol;Acc:HGNC:6664]
ENSG00000187800	1.19668	0.00604504	0.472648	PEAR1	platelet endothelial aggregation receptor 1 [Source:HGNC Symbol;Acc:HGNC:33631]
ENSG00000149294	1.20645	0.00124912	0.237353	NCAM1	neural cell adhesion molecule 1 [Source:HGNC Symbol;Acc:HGNC:7656]
ENSG00000067057	1.256	7.67672e-05	0.0656415	PFKP	phosphofructokinase, platelet [Source:HGNC Symbol;Acc:HGNC:8878]
ENSG00000146197	1.27553	0.00482424	0.465026	SCUBE3	signal peptide, CUB domain and EGF like domain containing 3 [Source:HGNC Symbol;Acc:HGNC:13655]
ENSG00000173848	1.31449	0.001282	0.239795	NET1	neuroepithelial cell transforming 1 [Source:HGNC Symbol;Acc:HGNC:14592]
ENSG00000152049	1.35583	0.00474896	0.465026	KCNE4	potassium voltage-gated channel subfamily E regulatory subunit 4 [Source:HGNC Symbol;Acc:HGNC:6244]
ENSG00000179715	1.35737	5.15423e-05	0.0560921	PCED1B	PC-esterase domain containing 1B [Source:HGNC Symbol;Acc:HGNC:28255]
ENSG00000197747	1.35773	0.00146183	0.253616	S100A10	S100 calcium binding protein A10 [Source:HGNC Symbol;Acc:HGNC:10487]
ENSG00000196155	1.36382	0.000568641	0.194492	PLEKHG4	pleckstrin homology and RhoGEF domain containing G4 [Source:HGNC Symbol;Acc:HGNC:24501]
ENSG00000186352	1.37061	0.000895379	0.223412	ANKRD37	ankyrin repeat domain 37 [Source:HGNC Symbol;Acc:HGNC:29593]
ENSG00000134107	1.3894	0.000237882	0.130808	BHLHE40	basic helix-loop-helix family member e40 [Source:HGNC Symbol;Acc:HGNC:1046]
ENSG00000170961	1.39371	0.00669006	0.485857	HAS2	hyaluronan synthase 2 [Source:HGNC Symbol;Acc:HGNC:4819]
ENSG00000171161	1.42665	0.00076565	0.222455	ZNF672	zinc finger protein 672 [Source:HGNC Symbol;Acc:HGNC:26179]
ENSG00000180611	1.43672	0.00320337	0.383476	MB21D2	Mab-21 domain containing 2 [Source:HGNC Symbol;Acc:HGNC:30438]
ENSG00000151376	1.45222	0.00482116	0.465026	ME3	malic enzyme 3 [Source:HGNC Symbol;Acc:HGNC:6985]
ENSG00000166396	1.45594	0.0054333	0.467928	SERPINB7	serpin family B member 7 [Source:HGNC Symbol;Acc:HGNC:13902]
ENSG00000186340	1.45851	1.11772e-05	0.0225576	THBS2	thrombospondin 2 [Source:HGNC Symbol;Acc:HGNC:11786]
ENSG00000165072	1.48862	0.00612667	0.472648	MAMDC2	MAM domain containing 2 [Source:HGNC Symbol;Acc:HGNC:23673]
ENSG00000173546	1.49329	0.000975123	0.224879	CSPG4	chondroitin sulfate proteoglycan 4 [Source:HGNC Symbol;Acc:HGNC:2466]
ENSG00000187123	1.49388	0.0050249	0.467928	LYPD6	LY6/PLAUR domain containing 6 [Source:HGNC Symbol;Acc:HGNC:28751]
ENSG00000108561	1.51017	0.00623204	0.473109	C1QBP	complement C1q binding protein [Source:HGNC Symbol;Acc:HGNC:1243]
ENSG00000122420	1.58768	0.00597271	0.472648	PTGFR	prostaglandin F receptor [Source:HGNC Symbol;Acc:HGNC:9600]
ENSG00000053371	1.59356	0.000895811	0.223412	AKR7A2	aldo-keto reductase family 7 member A2 [Source:HGNC Symbol;Acc:HGNC:389]
ENSG00000117069	1.61106	0.00587395	0.472648	ST6GALNAC5	ST6 N-acetylgalactosaminide alpha-2,6-sialyltransferase 5 [Source:HGNC Symbol;Acc:HGNC:19342]
ENSG00000231672	1.62178	7.55502e-05	0.0656415	DIRC3	disrupted in renal carcinoma 3 [Source:HGNC Symbol;Acc:HGNC:17805]
ENSG00000095637	1.65641	0.00167999	0.271773	SORBS1	sorbin and SH3 domain containing 1 [Source:HGNC Symbol;Acc:HGNC:14565]
ENSG00000049759	1.67685	0.00110341	0.224879	NEDD4L	NEDD4 like E3 ubiquitin protein ligase [Source:HGNC Symbol;Acc:HGNC:7728]
ENSG00000137124	1.67975	0.00381633	0.427201	ALDH1B1	aldehyde dehydrogenase 1 family member B1 [Source:HGNC Symbol;Acc:HGNC:407]
ENSG00000287516	1.69356	0.00504449	0.467928	None	novel transcript
ENSG00000105889	1.69504	0.00100999	0.224879	STEAP1B	STEAP family member 1B [Source:HGNC Symbol;Acc:HGNC:41907]
ENSG00000152952	1.70004	4.74184e-05	0.0560921	PLOD2	procollagen-lysine,2-oxoglutarate 5-dioxygenase 2 [Source:HGNC Symbol;Acc:HGNC:9082]
ENSG00000198121	1.78386	0.00231873	0.311559	LPAR1	lysophosphatidic acid receptor 1 [Source:HGNC Symbol;Acc:HGNC:3166]
ENSG00000118503	1.78853	0.00141515	0.24913	TNFAIP3	TNF alpha induced protein 3 [Source:HGNC Symbol;Acc:HGNC:11896]
ENSG00000128656	1.79632	0.000615162	0.19903	CHN1	chimerin 1 [Source:HGNC Symbol;Acc:HGNC:1943]
ENSG00000183671	1.79923	0.000812971	0.222455	CMKLR2	chemerin chemokine-like receptor 2 [Source:HGNC Symbol;Acc:HGNC:4463]
ENSG00000084636	1.86285	0.00101601	0.224879	COL16A1	collagen type XVI alpha 1 chain [Source:HGNC Symbol;Acc:HGNC:2193]
ENSG00000120708	1.92812	5.60397e-06	0.0175757	TGFBI	transforming growth factor beta induced [Source:HGNC Symbol;Acc:HGNC:11771]
ENSG00000115414	2.0109	0.000334881	0.137663	FN1	fibronectin 1 [Source:HGNC Symbol;Acc:HGNC:3778]
ENSG00000178860	2.04832	0.00423514	0.452668	MSC	musculin [Source:HGNC Symbol;Acc:HGNC:7321]
ENSG00000135919	2.10328	0.000119786	0.089622	SERPINE2	serpin family E member 2 [Source:HGNC Symbol;Acc:HGNC:8951]
ENSG00000272695	2.10704	0.00197321	0.295267	GAS6-DT	GAS6 divergent transcript [Source:HGNC Symbol;Acc:HGNC:43694]
ENSG00000177675	2.12844	0.00333029	0.394722	CD163L1	CD163 molecule like 1 [Source:HGNC Symbol;Acc:HGNC:30375]
ENSG00000163364	2.13063	0.000248114	0.130808	LINC01116	long intergenic non-protein coding RNA 1116 [Source:HGNC Symbol;Acc:HGNC:49259]
ENSG00000152256	2.15795	5.87276e-06	0.0175757	PDK1	pyruvate dehydrogenase kinase 1 [Source:HGNC Symbol;Acc:HGNC:8809]
ENSG00000102385	2.21072	0.00611494	0.472648	DRP2	dystrophin related protein 2 [Source:HGNC Symbol;Acc:HGNC:3032]
ENSG00000072657	2.37289	0.00141005	0.24913	TRHDE	thyrotropin releasing hormone degrading enzyme [Source:HGNC Symbol;Acc:HGNC:30748]
ENSG00000139209	2.40087	0.00480477	0.465026	SLC38A4	solute carrier family 38 member 4 [Source:HGNC Symbol;Acc:HGNC:14679]
ENSG00000156463	2.40602	0.00303389	0.37442	SH3RF2	SH3 domain containing ring finger 2 [Source:HGNC Symbol;Acc:HGNC:26299]
ENSG00000138798	2.43281	0.0018937	0.286956	EGF	epidermal growth factor [Source:HGNC Symbol;Acc:HGNC:3229]
ENSG00000138829	2.45479	0.00104848	0.224879	FBN2	fibrillin 2 [Source:HGNC Symbol;Acc:HGNC:3604]
ENSG00000197415	2.51854	0.00523625	0.467928	VEPH1	ventricular zone expressed PH domain containing 1 [Source:HGNC Symbol;Acc:HGNC:25735]
ENSG00000185652	2.54944	0.00357655	0.415679	NTF3	neurotrophin 3 [Source:HGNC Symbol;Acc:HGNC:8023]
ENSG00000136542	2.56737	0.00483766	0.465026	GALNT5	polypeptide N-acetylgalactosaminyltransferase 5 [Source:HGNC Symbol;Acc:HGNC:4127]
ENSG00000145681	2.59979	0.00385412	0.427201	HAPLN1	hyaluronan and proteoglycan link protein 1 [Source:HGNC Symbol;Acc:HGNC:2380]
ENSG00000236333	2.60883	0.000815433	0.222455	TRHDE-AS1	TRHDE antisense RNA 1 [Source:HGNC Symbol;Acc:HGNC:27471]
ENSG00000138347	2.70186	0.00214852	0.307806	MYPN	myopalladin [Source:HGNC Symbol;Acc:HGNC:23246]
ENSG00000046604	2.72052	0.00272872	0.34369	DSG2	desmoglein 2 [Source:HGNC Symbol;Acc:HGNC:3049]
ENSG00000186854	2.72339	0.00554647	0.468978	TRABD2A	TraB domain containing 2A [Source:HGNC Symbol;Acc:HGNC:27013]
ENSG00000124343	2.75665	0.00455073	0.465026	XG	Xg glycoprotein (Xg blood group) [Source:HGNC Symbol;Acc:HGNC:12806]
ENSG00000142583	2.75671	0.00685906	0.485857	SLC2A5	solute carrier family 2 member 5 [Source:HGNC Symbol;Acc:HGNC:11010]
ENSG00000247095	2.76177	0.000463767	0.163287	MIR210HG	MIR210 host gene [Source:HGNC Symbol;Acc:HGNC:39524]
ENSG00000128422	2.86231	0.00540646	0.467928	KRT17	keratin 17 [Source:HGNC Symbol;Acc:HGNC:6427]
ENSG00000169432	2.90251	0.0056022	0.468978	SCN9A	sodium voltage-gated channel alpha subunit 9 [Source:HGNC Symbol;Acc:HGNC:10597]
ENSG00000170624	3.07757	0.000357414	0.137663	SGCD	sarcoglycan delta [Source:HGNC Symbol;Acc:HGNC:10807]
ENSG00000041982	3.10535	6.08295e-05	0.0606825	TNC	tenascin C [Source:HGNC Symbol;Acc:HGNC:5318]
ENSG00000157168	3.14458	0.000154132	0.098027	NRG1	neuregulin 1 [Source:HGNC Symbol;Acc:HGNC:7997]
ENSG00000163017	3.20551	0.00109478	0.224879	ACTG2	actin gamma 2, smooth muscle [Source:HGNC Symbol;Acc:HGNC:145]
ENSG00000117586	3.28899	0.000394078	0.142955	TNFSF4	TNF superfamily member 4 [Source:HGNC Symbol;Acc:HGNC:11934]
ENSG00000139629	3.43924	2.79815e-05	0.0428601	GALNT6	polypeptide N-acetylgalactosaminyltransferase 6 [Source:HGNC Symbol;Acc:HGNC:4128]
ENSG00000040731	3.46003	0.00271877	0.34369	CDH10	cadherin 10 [Source:HGNC Symbol;Acc:HGNC:1749]
ENSG00000178776	3.4944	5.49249e-06	0.0175757	C5orf46	chromosome 5 open reading frame 46 [Source:HGNC Symbol;Acc:HGNC:33768]
ENSG00000115461	3.75192	3.63311e-05	0.0483244	IGFBP5	insulin like growth factor binding protein 5 [Source:HGNC Symbol;Acc:HGNC:5474]
ENSG00000154553	4.04062	0.00159122	0.26861	PDLIM3	PDZ and LIM domain 3 [Source:HGNC Symbol;Acc:HGNC:20767]
ENSG00000260604	4.057	0.000145311	0.098027	None	novel transcript
ENSG00000133110	4.23272	0.00118566	0.233711	POSTN	periostin [Source:HGNC Symbol;Acc:HGNC:16953]
ENSG00000265107	4.33012	0.00110834	0.224879	GJA5	gap junction protein alpha 5 [Source:HGNC Symbol;Acc:HGNC:4279]
ENSG00000150556	4.3555	0.000803424	0.222455	LYPD6B	LY6/PLAUR domain containing 6B [Source:HGNC Symbol;Acc:HGNC:27018]
ENSG00000124212	4.39634	0.00229277	0.311559	PTGIS	prostaglandin I2 synthase [Source:HGNC Symbol;Acc:HGNC:9603]
ENSG00000151892	4.51367	0.000808324	0.222455	GFRA1	GDNF family receptor alpha 1 [Source:HGNC Symbol;Acc:HGNC:4243]
ENSG00000133169	4.56723	0.000334108	0.137663	BEX1	brain expressed X-linked 1 [Source:HGNC Symbol;Acc:HGNC:1036]
ENSG00000134198	4.76534	0.00240664	0.316592	TSPAN2	tetraspanin 2 [Source:HGNC Symbol;Acc:HGNC:20659]
ENSG00000178031	5.06643	0.000178505	0.106844	ADAMTSL1	ADAMTS like 1 [Source:HGNC Symbol;Acc:HGNC:14632]
ENSG00000138395	5.83616	0.00121043	0.233711	CDK15	cyclin dependent kinase 15 [Source:HGNC Symbol;Acc:HGNC:14434]
ENSG00000134259	6.50229	0.000155585	0.098027	NGF	nerve growth factor [Source:HGNC Symbol;Acc:HGNC:7808]
ENSG00000154678	6.94628	0.00083335	0.222455	PDE1C	phosphodiesterase 1C [Source:HGNC Symbol;Acc:HGNC:8776]
5. EcESCs exposed to hypoxia vs EuESCs exposed to normoxia
Gene ID	log2FoldChange	pvalue	padj	Gene name	Gene name description
ENSG00000167755	-8.68771	2.39291723273156e-05	0.00317675931004795	KLK6	kallikrein related peptidase 6 [Source:HGNC Symbol;Acc:HGNC:6367]
ENSG00000137726	-5.43966	1.95564399533808e-05	0.00282533038385313	FXYD6	FXYD domain containing ion transport regulator 6 [Source:HGNC Symbol;Acc:HGNC:4030]
ENSG00000152583	-5.42732	0.000430912384366195	0.0194187305688693	SPARCL1	SPARC like 1 [Source:HGNC Symbol;Acc:HGNC:11220]
ENSG00000135144	-5.26707	0.000512499786349659	0.0217017150909442	DTX1	deltex E3 ubiquitin ligase 1 [Source:HGNC Symbol;Acc:HGNC:3060]
ENSG00000128052	-4.99395	3.25861781696077e-05	0.00381103112307412	KDR	kinase insert domain receptor [Source:HGNC Symbol;Acc:HGNC:6307]
ENSG00000167244	-4.96712	1.08567583713252e-05	0.00181801353818009	IGF2	insulin like growth factor 2 [Source:HGNC Symbol;Acc:HGNC:5466]
ENSG00000121966	-4.88133	0.000935107025261089	0.0319372883285714	CXCR4	C-X-C motif chemokine receptor 4 [Source:HGNC Symbol;Acc:HGNC:2561]
ENSG00000137675	-4.83477	0.000487404828236533	0.0209399345448792	MMP27	matrix metallopeptidase 27 [Source:HGNC Symbol;Acc:HGNC:14250]
ENSG00000108932	-4.79059	2.07933065298128e-05	0.00289066193418228	SLC16A6	solute carrier family 16 member 6 [Source:HGNC Symbol;Acc:HGNC:10927]
ENSG00000078725	-4.78287	8.16887563443034e-07	0.000273583071247649	BRINP1	BMP/retinoic acid inducible neural specific 1 [Source:HGNC Symbol;Acc:HGNC:2687]
ENSG00000165238	-4.70379	0.000233148092466052	0.0132141165022298	WNK2	WNK lysine deficient protein kinase 2 [Source:HGNC Symbol;Acc:HGNC:14542]
ENSG00000138207	-4.44537	0.000167048572504349	0.0104671396893776	RBP4	retinol binding protein 4 [Source:HGNC Symbol;Acc:HGNC:9922]
ENSG00000146070	-4.39636	0.00120833441260801	0.0371057048670937	PLA2G7	phospholipase A2 group VII [Source:HGNC Symbol;Acc:HGNC:9040]
ENSG00000171811	-4.27721	0.000267286540440792	0.0144204715297493	CFAP46	cilia and flagella associated protein 46 [Source:HGNC Symbol;Acc:HGNC:25247]
ENSG00000156298	-4.17192	0.000399599439721725	0.0186344852649979	TSPAN7	tetraspanin 7 [Source:HGNC Symbol;Acc:HGNC:11854]
ENSG00000204403	-4.03868	0.000636422212228945	0.0253468046470425	CASP12	caspase 12 (gene/pseudogene) [Source:HGNC Symbol;Acc:HGNC:19004]
ENSG00000185274	-4.03524	0.00182633428793578	0.0477696426248291	GALNT17	polypeptide N-acetylgalactosaminyltransferase 17 [Source:HGNC Symbol;Acc:HGNC:16347]
ENSG00000138449	-4.02119	6.77009495105125e-07	0.000237533617139741	SLC40A1	solute carrier family 40 member 1 [Source:HGNC Symbol;Acc:HGNC:10909]
ENSG00000139725	-4.01341	0.000382793736544856	0.0180272309092029	RHOF	ras homolog family member F, filopodia associated [Source:HGNC Symbol;Acc:HGNC:15703]
ENSG00000143839	-3.90291	0.000428552524958355	0.0194187305688693	REN	renin [Source:HGNC Symbol;Acc:HGNC:9958]
ENSG00000125845	-3.83097	0.00040665286275762	0.0187631941076546	BMP2	bone morphogenetic protein 2 [Source:HGNC Symbol;Acc:HGNC:1069]
ENSG00000178726	-3.81156	0.000198411522079326	0.0118853341030933	THBD	thrombomodulin [Source:HGNC Symbol;Acc:HGNC:11784]
ENSG00000134321	-3.71975	6.07678489692449e-06	0.00117662270879094	RSAD2	radical S-adenosyl methionine domain containing 2 [Source:HGNC Symbol;Acc:HGNC:30908]
ENSG00000160191	-3.65681	1.62079311805417e-06	0.000459307834377811	PDE9A	phosphodiesterase 9A [Source:HGNC Symbol;Acc:HGNC:8795]
ENSG00000129048	-3.62691	3.80160382751796e-05	0.0039919260010615	ACKR4	atypical chemokine receptor 4 [Source:HGNC Symbol;Acc:HGNC:1611]
ENSG00000165092	-3.46284	1.99281898940182e-05	0.00285108549784711	ALDH1A1	aldehyde dehydrogenase 1 family member A1 [Source:HGNC Symbol;Acc:HGNC:402]
ENSG00000154258	-3.45229	3.59310775598165e-05	0.00391536980782416	ABCA9	ATP binding cassette subfamily A member 9 [Source:HGNC Symbol;Acc:HGNC:39]
ENSG00000173083	-3.41968	0.000291356888469144	0.0153336968160047	HPSE	heparanase [Source:HGNC Symbol;Acc:HGNC:5164]
ENSG00000102760	-3.40604	0.00022922405601245	0.0130418752486466	RGCC	regulator of cell cycle [Source:HGNC Symbol;Acc:HGNC:20369]
ENSG00000126950	-3.21887	0.000422658879167667	0.0193060214555128	TMEM35A	transmembrane protein 35A [Source:HGNC Symbol;Acc:HGNC:25864]
ENSG00000095303	-3.18743	0.00121114605013524	0.0371057048670937	PTGS1	prostaglandin-endoperoxide synthase 1 [Source:HGNC Symbol;Acc:HGNC:9604]
ENSG00000196932	-3.15072	1.56689577312709e-05	0.00240518501175008	TMEM26	transmembrane protein 26 [Source:HGNC Symbol;Acc:HGNC:28550]
ENSG00000156966	-3.1389	0.000145636963007517	0.00945421271752764	B3GNT7	UDP-GlcNAc:betaGal beta-1,3-N-acetylglucosaminyltransferase 7 [Source:HGNC Symbol;Acc:HGNC:18811]
ENSG00000123496	-3.12152	0.000887682976679456	0.0309241048329751	IL13RA2	interleukin 13 receptor subunit alpha 2 [Source:HGNC Symbol;Acc:HGNC:5975]
ENSG00000014257	-3.10751	9.08280899925176e-05	0.00704380792664782	ACP3	acid phosphatase 3 [Source:HGNC Symbol;Acc:HGNC:125]
ENSG00000006210	-3.10628	0.000669098087287198	0.0262928784380377	CX3CL1	C-X3-C motif chemokine ligand 1 [Source:HGNC Symbol;Acc:HGNC:10647]
ENSG00000108960	-3.06696	0.000100610713763961	0.00737611680609815	MMD	monocyte to macrophage differentiation associated [Source:HGNC Symbol;Acc:HGNC:7153]
ENSG00000154262	-3.01055	0.00115190979972556	0.0362229398234779	ABCA6	ATP binding cassette subfamily A member 6 [Source:HGNC Symbol;Acc:HGNC:36]
ENSG00000150551	-3.00845	0.000990078850200168	0.0328281210280169	LYPD1	LY6/PLAUR domain containing 1 [Source:HGNC Symbol;Acc:HGNC:28431]
ENSG00000139132	-2.98721	3.3850098251661e-06	0.000816813901210253	FGD4	FYVE, RhoGEF and PH domain containing 4 [Source:HGNC Symbol;Acc:HGNC:19125]
ENSG00000108551	-2.95972	6.90101349585099e-05	0.00568119189245029	RASD1	ras related dexamethasone induced 1 [Source:HGNC Symbol;Acc:HGNC:15828]
ENSG00000171310	-2.94979	8.65903091351968e-05	0.00678720635859713	CHST11	carbohydrate sulfotransferase 11 [Source:HGNC Symbol;Acc:HGNC:17422]
ENSG00000068831	-2.92002	3.81963603521764e-05	0.0039919260010615	RASGRP2	RAS guanyl releasing protein 2 [Source:HGNC Symbol;Acc:HGNC:9879]
ENSG00000070731	-2.87491	0.000791429143403258	0.0286029089901626	ST6GALNAC2	ST6 N-acetylgalactosaminide alpha-2,6-sialyltransferase 2 [Source:HGNC Symbol;Acc:HGNC:10867]
ENSG00000130513	-2.80058	1.45382953581128e-07	8.23985847681346e-05	GDF15	growth differentiation factor 15 [Source:HGNC Symbol;Acc:HGNC:30142]
ENSG00000144619	-2.79934	8.23688987822084e-05	0.00656101671597094	CNTN4	contactin 4 [Source:HGNC Symbol;Acc:HGNC:2174]
ENSG00000257894	-2.77348	0.000855412844861127	0.0300844001954023	None	novel transcript
ENSG00000146072	-2.7555	2.5152430999474e-06	0.000670584331902536	TNFRSF21	TNF receptor superfamily member 21 [Source:HGNC Symbol;Acc:HGNC:13469]
ENSG00000011465	-2.70504	0.00128695001870653	0.0382348699106037	DCN	decorin [Source:HGNC Symbol;Acc:HGNC:2705]
ENSG00000106123	-2.6547	0.00123189431219252	0.0373236830578075	EPHB6	EPH receptor B6 [Source:HGNC Symbol;Acc:HGNC:3396]
ENSG00000001561	-2.60327	0.000736003075346285	0.0275686569395279	ENPP4	ectonucleotide pyrophosphatase/phosphodiesterase 4 [Source:HGNC Symbol;Acc:HGNC:3359]
ENSG00000150907	-2.60153	1.37021333211485e-05	0.00219472431109179	FOXO1	forkhead box O1 [Source:HGNC Symbol;Acc:HGNC:3819]
ENSG00000081059	-2.57752	0.000106374535749164	0.00758137940680187	TCF7	transcription factor 7 [Source:HGNC Symbol;Acc:HGNC:11639]
ENSG00000176641	-2.56811	0.00016040615635721	0.0101885565520683	RNF152	ring finger protein 152 [Source:HGNC Symbol;Acc:HGNC:26811]
ENSG00000133687	-2.55284	9.43811687157018e-08	5.62305835632181e-05	TMTC1	transmembrane O-mannosyltransferase targeting cadherins 1 [Source:HGNC Symbol;Acc:HGNC:24099]
ENSG00000145703	-2.54757	0.00121672431380545	0.0371057048670937	IQGAP2	IQ motif containing GTPase activating protein 2 [Source:HGNC Symbol;Acc:HGNC:6111]
ENSG00000155275	-2.54634	2.32929870449494e-05	0.00312041324631249	TRMT44	tRNA methyltransferase 44 homolog [Source:HGNC Symbol;Acc:HGNC:26653]
ENSG00000184408	-2.51696	0.000776816774958408	0.0281950049157318	KCND2	potassium voltage-gated channel subfamily D member 2 [Source:HGNC Symbol;Acc:HGNC:6238]
ENSG00000170962	-2.48659	1.18675458316133e-06	0.000349760310749308	PDGFD	platelet derived growth factor D [Source:HGNC Symbol;Acc:HGNC:30620]
ENSG00000182175	-2.48076	0.000222192340129696	0.0127401802496156	RGMA	repulsive guidance molecule BMP co-receptor a [Source:HGNC Symbol;Acc:HGNC:30308]
ENSG00000158258	-2.44163	0.000984658079522429	0.0327537730470486	CLSTN2	calsyntenin 2 [Source:HGNC Symbol;Acc:HGNC:17448]
ENSG00000236013	-2.42483	0.000118241767122875	0.00810423572243108	LINC02941	long intergenic non-protein coding RNA 2941 [Source:HGNC Symbol;Acc:HGNC:55956]
ENSG00000211448	-2.39027	0.00070447477298212	0.0271048048424661	DIO2	iodothyronine deiodinase 2 [Source:HGNC Symbol;Acc:HGNC:2884]
ENSG00000231426	-2.3625	0.000545995145589979	0.0225372113877141	FILNC1	FOXO induced long non-coding RNA 1 [Source:HGNC Symbol;Acc:HGNC:53755]
ENSG00000099260	-2.30269	6.0103770968495e-06	0.00117662270879094	PALMD	palmdelphin [Source:HGNC Symbol;Acc:HGNC:15846]
ENSG00000005249	-2.25027	0.000465593125334339	0.0202388799260378	PRKAR2B	protein kinase cAMP-dependent type II regulatory subunit beta [Source:HGNC Symbol;Acc:HGNC:9392]
ENSG00000204397	-2.21172	0.00180343575233997	0.0474561236544318	CARD16	caspase recruitment domain family member 16 [Source:HGNC Symbol;Acc:HGNC:33701]
ENSG00000081818	-2.20729	0.000473806055454175	0.0204514901742078	PCDHB4	protocadherin beta 4 [Source:HGNC Symbol;Acc:HGNC:8689]
ENSG00000184005	-2.19734	0.000442316971702539	0.0195244153580053	ST6GALNAC3	ST6 N-acetylgalactosaminide alpha-2,6-sialyltransferase 3 [Source:HGNC Symbol;Acc:HGNC:19343]
ENSG00000170323	-2.19241	7.99705718496604e-05	0.00640459971074236	FABP4	fatty acid binding protein 4 [Source:HGNC Symbol;Acc:HGNC:3559]
ENSG00000179431	-2.18172	0.000101737041343534	0.00738520709969618	FJX1	four-jointed box kinase 1 [Source:HGNC Symbol;Acc:HGNC:17166]
ENSG00000172399	-2.15313	0.00112049850419815	0.0357395367053332	MYOZ2	myozenin 2 [Source:HGNC Symbol;Acc:HGNC:1330]
ENSG00000144908	-2.13718	0.000731217840841618	0.0275686569395279	ALDH1L1	aldehyde dehydrogenase 1 family member L1 [Source:HGNC Symbol;Acc:HGNC:3978]
ENSG00000155511	-2.11295	0.000920665455406329	0.0318812822022787	GRIA1	glutamate ionotropic receptor AMPA type subunit 1 [Source:HGNC Symbol;Acc:HGNC:4571]
ENSG00000253276	-2.10214	0.00032195297728555	0.0160823697399317	CCDC71L	coiled-coil domain containing 71 like [Source:HGNC Symbol;Acc:HGNC:26685]
ENSG00000185716	-2.08279	0.00015635623588853	0.010017676052406	MOSMO	modulator of smoothened [Source:HGNC Symbol;Acc:HGNC:27087]
ENSG00000249242	-2.06815	0.00178127277896306	0.047211910154817	TMEM150C	transmembrane protein 150C [Source:HGNC Symbol;Acc:HGNC:37263]
ENSG00000087494	-2.06196	0.00171178699693677	0.045990286330293	PTHLH	parathyroid hormone like hormone [Source:HGNC Symbol;Acc:HGNC:9607]
ENSG00000134470	-2.04851	5.48126934459733e-05	0.00501209995510164	IL15RA	interleukin 15 receptor subunit alpha [Source:HGNC Symbol;Acc:HGNC:5978]
ENSG00000182010	-2.04624	0.000382907388340154	0.0180272309092029	RTKN2	rhotekin 2 [Source:HGNC Symbol;Acc:HGNC:19364]
ENSG00000196562	-2.03884	0.000707914282544154	0.0271662105926319	SULF2	sulfatase 2 [Source:HGNC Symbol;Acc:HGNC:20392]
ENSG00000145861	-2.02883	0.000206500398246796	0.0122247064357871	C1QTNF2	C1q and TNF related 2 [Source:HGNC Symbol;Acc:HGNC:14325]
ENSG00000104290	-2.00985	0.00182605845256317	0.0477696426248291	FZD3	frizzled class receptor 3 [Source:HGNC Symbol;Acc:HGNC:4041]
ENSG00000105855	-2.00843	0.00176126086993117	0.0469329840493774	ITGB8	integrin subunit beta 8 [Source:HGNC Symbol;Acc:HGNC:6163]
ENSG00000145390	-1.97623	9.69381035796722e-06	0.00172106011367476	USP53	ubiquitin specific peptidase 53 [Source:HGNC Symbol;Acc:HGNC:29255]
ENSG00000173153	-1.9651	3.54133328745049e-05	0.00389440950178137	ESRRA	estrogen related receptor alpha [Source:HGNC Symbol;Acc:HGNC:3471]
ENSG00000137672	-1.95427	0.000835100673283714	0.0297247428055768	TRPC6	transient receptor potential cation channel subfamily C member 6 [Source:HGNC Symbol;Acc:HGNC:12338]
ENSG00000136514	-1.94337	1.73275088208142e-05	0.00260506683473708	RTP4	receptor transporter protein 4 [Source:HGNC Symbol;Acc:HGNC:23992]
ENSG00000127241	-1.89729	6.6578850363049e-05	0.00557446556221529	MASP1	MBL associated serine protease 1 [Source:HGNC Symbol;Acc:HGNC:6901]
ENSG00000151617	-1.8941	0.00135428714785959	0.0394466478595078	EDNRA	endothelin receptor type A [Source:HGNC Symbol;Acc:HGNC:3179]
ENSG00000108176	-1.89228	9.9696329782666e-05	0.00737611680609815	DNAJC12	DnaJ heat shock protein family (Hsp40) member C12 [Source:HGNC Symbol;Acc:HGNC:28908]
ENSG00000226742	-1.85408	0.00116632279274438	0.0364129929531381	HSBP1L1	heat shock factor binding protein 1 like 1 [Source:HGNC Symbol;Acc:HGNC:37243]
ENSG00000134853	-1.85359	1.02483716984911e-05	0.0017754900929342	PDGFRA	platelet derived growth factor receptor alpha [Source:HGNC Symbol;Acc:HGNC:8803]
ENSG00000162174	-1.7996	8.75180024542684e-05	0.00682362584214867	ASRGL1	asparaginase and isoaspartyl peptidase 1 [Source:HGNC Symbol;Acc:HGNC:16448]
ENSG00000179148	-1.79641	0.00190167733879125	0.048905963812265	ALOXE3	arachidonate lipoxygenase 3 [Source:HGNC Symbol;Acc:HGNC:13743]
ENSG00000150510	-1.78517	3.83421306289371e-06	0.000869245595304641	FAM124A	family with sequence similarity 124 member A [Source:HGNC Symbol;Acc:HGNC:26413]
ENSG00000138678	-1.7818	0.000764479814191325	0.0278845904503054	GPAT3	glycerol-3-phosphate acyltransferase 3 [Source:HGNC Symbol;Acc:HGNC:28157]
ENSG00000120833	-1.76866	0.000943867347219674	0.0319372883285714	SOCS2	suppressor of cytokine signaling 2 [Source:HGNC Symbol;Acc:HGNC:19382]
ENSG00000248429	-1.76041	0.000121104759113884	0.00826203578843607	GASK1B-AS1	GASK1B antisense RNA 1 [Source:HGNC Symbol;Acc:HGNC:53132]
ENSG00000197959	-1.73667	6.64471555643543e-05	0.00557446556221529	DNM3	dynamin 3 [Source:HGNC Symbol;Acc:HGNC:29125]
ENSG00000108370	-1.72813	2.31325442843533e-05	0.00312041324631249	RGS9	regulator of G protein signaling 9 [Source:HGNC Symbol;Acc:HGNC:10004]
ENSG00000176771	-1.71033	0.00135442351729311	0.0394466478595078	NCKAP5	NCK associated protein 5 [Source:HGNC Symbol;Acc:HGNC:29847]
ENSG00000165507	-1.70328	0.000423716272697269	0.0193060214555128	DEPP1	DEPP1 autophagy regulator [Source:HGNC Symbol;Acc:HGNC:23355]
ENSG00000047346	-1.69539	2.52687340514748e-07	0.000109517666171333	FAM214A	family with sequence similarity 214 member A [Source:HGNC Symbol;Acc:HGNC:25609]
ENSG00000183508	-1.69349	0.000169626747607829	0.0105469187879704	TENT5C	terminal nucleotidyltransferase 5C [Source:HGNC Symbol;Acc:HGNC:24712]
ENSG00000154188	-1.66535	3.69115790969306e-07	0.000143139218308518	ANGPT1	angiopoietin 1 [Source:HGNC Symbol;Acc:HGNC:484]
ENSG00000075651	-1.66166	0.00147353588036653	0.0414389784982464	PLD1	phospholipase D1 [Source:HGNC Symbol;Acc:HGNC:9067]
ENSG00000103811	-1.64565	0.000685178611862517	0.0267819417092999	CTSH	cathepsin H [Source:HGNC Symbol;Acc:HGNC:2535]
ENSG00000133134	-1.61875	9.2681173384234e-05	0.00704380792664782	BEX2	brain expressed X-linked 2 [Source:HGNC Symbol;Acc:HGNC:30933]
ENSG00000057657	-1.58309	6.53266861352526e-05	0.00553249452235105	PRDM1	PR/SET domain 1 [Source:HGNC Symbol;Acc:HGNC:9346]
ENSG00000153982	-1.57922	0.000926341064543581	0.0319310825528194	GDPD1	glycerophosphodiester phosphodiesterase domain containing 1 [Source:HGNC Symbol;Acc:HGNC:20883]
ENSG00000251442	-1.57092	5.74475437856569e-05	0.00510056533604447	LINC01094	long intergenic non-protein coding RNA 1094 [Source:HGNC Symbol;Acc:HGNC:49219]
ENSG00000119862	-1.56468	0.00139883869052024	0.0401036710963156	LGALSL	galectin like [Source:HGNC Symbol;Acc:HGNC:25012]
ENSG00000138134	-1.54134	7.00130078384038e-05	0.00573173157503732	STAMBPL1	STAM binding protein like 1 [Source:HGNC Symbol;Acc:HGNC:24105]
ENSG00000137198	-1.528	0.000753735583238543	0.0276294715288636	GMPR	guanosine monophosphate reductase [Source:HGNC Symbol;Acc:HGNC:4376]
ENSG00000136943	-1.52794	0.000107376490546236	0.00758137940680187	CTSV	cathepsin V [Source:HGNC Symbol;Acc:HGNC:2538]
ENSG00000138311	-1.51267	0.00105152770107697	0.0340355224373719	ZNF365	zinc finger protein 365 [Source:HGNC Symbol;Acc:HGNC:18194]
ENSG00000198963	-1.47793	0.00177777095934141	0.047211910154817	RORB	RAR related orphan receptor B [Source:HGNC Symbol;Acc:HGNC:10259]
ENSG00000164125	-1.45909	0.000136067455030525	0.00895129472022242	GASK1B	golgi associated kinase 1B [Source:HGNC Symbol;Acc:HGNC:25312]
ENSG00000136859	-1.44992	1.65575012940606e-05	0.00251537462958018	ANGPTL2	angiopoietin like 2 [Source:HGNC Symbol;Acc:HGNC:490]
ENSG00000112419	-1.42149	0.000641649919326998	0.0254861272539155	PHACTR2	phosphatase and actin regulator 2 [Source:HGNC Symbol;Acc:HGNC:20956]
ENSG00000106537	-1.40572	0.000720125583139004	0.027491633660975	TSPAN13	tetraspanin 13 [Source:HGNC Symbol;Acc:HGNC:21643]
ENSG00000111058	-1.38341	0.00193021423201035	0.0492957312355365	ACSS3	acyl-CoA synthetase short chain family member 3 [Source:HGNC Symbol;Acc:HGNC:24723]
ENSG00000151748	-1.38163	0.000626714592972246	0.0252329678744235	SAV1	salvador family WW domain containing protein 1 [Source:HGNC Symbol;Acc:HGNC:17795]
ENSG00000188042	-1.31876	3.23807303787773e-06	0.000795270738102771	ARL4C	ADP ribosylation factor like GTPase 4C [Source:HGNC Symbol;Acc:HGNC:698]
ENSG00000007384	-1.29824	6.82497678157188e-05	0.00565016055355299	RHBDF1	rhomboid 5 homolog 1 [Source:HGNC Symbol;Acc:HGNC:20561]
ENSG00000198157	-1.27644	6.08077283797465e-05	0.00536564482277811	HMGN5	high mobility group nucleosome binding domain 5 [Source:HGNC Symbol;Acc:HGNC:8013]
ENSG00000145675	-1.2764	0.000343081019543683	0.0169085013511562	PIK3R1	phosphoinositide-3-kinase regulatory subunit 1 [Source:HGNC Symbol;Acc:HGNC:8979]
ENSG00000181722	-1.26654	0.00054088955406722	0.022459541940011	ZBTB20	zinc finger and BTB domain containing 20 [Source:HGNC Symbol;Acc:HGNC:13503]
ENSG00000154736	-1.25914	0.00188880066813442	0.0486912920446937	ADAMTS5	ADAM metallopeptidase with thrombospondin type 1 motif 5 [Source:HGNC Symbol;Acc:HGNC:221]
ENSG00000197208	-1.2471	7.22325222322151e-05	0.00586795421993609	SLC22A4	solute carrier family 22 member 4 [Source:HGNC Symbol;Acc:HGNC:10968]
ENSG00000123342	-1.24688	0.00125306268118476	0.0376244260742727	MMP19	matrix metallopeptidase 19 [Source:HGNC Symbol;Acc:HGNC:7165]
ENSG00000179542	-1.24436	0.00140848983843864	0.0402238493395965	SLITRK4	SLIT and NTRK like family member 4 [Source:HGNC Symbol;Acc:HGNC:23502]
ENSG00000230630	-1.2407	0.000313733748832822	0.015976075492617	DNM3OS	DNM3 opposite strand/antisense RNA [Source:HGNC Symbol;Acc:HGNC:41228]
ENSG00000213949	-1.23059	0.00178838946660428	0.0472532627575679	ITGA1	integrin subunit alpha 1 [Source:HGNC Symbol;Acc:HGNC:6134]
ENSG00000138593	-1.22881	0.000605908253115711	0.0245968705727634	SECISBP2L	SECIS binding protein 2 like [Source:HGNC Symbol;Acc:HGNC:28997]
ENSG00000119900	-1.21586	0.000134151923879786	0.00890478716347987	OGFRL1	opioid growth factor receptor like 1 [Source:HGNC Symbol;Acc:HGNC:21378]
ENSG00000171105	-1.20302	0.00128573207821404	0.0382348699106037	INSR	insulin receptor [Source:HGNC Symbol;Acc:HGNC:6091]
ENSG00000116729	-1.19597	0.000268133088976065	0.0144204715297493	WLS	Wnt ligand secretion mediator [Source:HGNC Symbol;Acc:HGNC:30238]
ENSG00000187098	-1.18665	7.16044977283628e-07	0.000245386948494222	MITF	melanocyte inducing transcription factor [Source:HGNC Symbol;Acc:HGNC:7105]
ENSG00000130511	-1.15549	0.00107295177461838	0.0345218719449267	SSBP4	single stranded DNA binding protein 4 [Source:HGNC Symbol;Acc:HGNC:15676]
ENSG00000132361	-1.15349	0.000729344718898465	0.0275686569395279	CLUH	clustered mitochondria homolog [Source:HGNC Symbol;Acc:HGNC:29094]
ENSG00000003436	-1.13857	0.000350637049463891	0.0171660716308967	TFPI	tissue factor pathway inhibitor [Source:HGNC Symbol;Acc:HGNC:11760]
ENSG00000103647	-1.13037	0.00052258959892796	0.0220025152280069	CORO2B	coronin 2B [Source:HGNC Symbol;Acc:HGNC:2256]
ENSG00000198483	-1.11981	0.000529178935497876	0.0222164694971416	ANKRD35	ankyrin repeat domain 35 [Source:HGNC Symbol;Acc:HGNC:26323]
ENSG00000169902	-1.11869	0.000281688733464671	0.0149315294112784	TPST1	tyrosylprotein sulfotransferase 1 [Source:HGNC Symbol;Acc:HGNC:12020]
ENSG00000137075	-1.093	0.00158623041955568	0.0432171913964653	RNF38	ring finger protein 38 [Source:HGNC Symbol;Acc:HGNC:18052]
ENSG00000151117	-1.09077	0.00119139342754118	0.0368831377064008	TMEM86A	transmembrane protein 86A [Source:HGNC Symbol;Acc:HGNC:26890]
ENSG00000143013	-1.09056	0.00186215028327436	0.0483109974900194	LMO4	LIM domain only 4 [Source:HGNC Symbol;Acc:HGNC:6644]
ENSG00000166562	-1.08785	0.000311255941631742	0.015976075492617	SEC11C	SEC11 homolog C, signal peptidase complex subunit [Source:HGNC Symbol;Acc:HGNC:23400]
ENSG00000139679	-1.06772	0.00185307695717784	0.0481603916066538	LPAR6	lysophosphatidic acid receptor 6 [Source:HGNC Symbol;Acc:HGNC:15520]
ENSG00000185630	-1.06263	0.000250128699230665	0.0137533451935189	PBX1	PBX homeobox 1 [Source:HGNC Symbol;Acc:HGNC:8632]
ENSG00000132669	-1.05947	0.00190901831238027	0.0489239893064968	RIN2	Ras and Rab interactor 2 [Source:HGNC Symbol;Acc:HGNC:18750]
ENSG00000184205	-1.05732	0.000441229996167989	0.0195244153580053	TSPYL2	TSPY like 2 [Source:HGNC Symbol;Acc:HGNC:24358]
ENSG00000157800	-1.04639	0.00114303934198613	0.0362229398234779	SLC37A3	solute carrier family 37 member 3 [Source:HGNC Symbol;Acc:HGNC:20651]
ENSG00000163293	-1.03501	0.00196520698239273	0.0495878255009234	NIPAL1	NIPA like domain containing 1 [Source:HGNC Symbol;Acc:HGNC:27194]
ENSG00000152661	-1.03254	0.00180167573792063	0.0474561236544318	GJA1	gap junction protein alpha 1 [Source:HGNC Symbol;Acc:HGNC:4274]
ENSG00000143669	-1.03034	2.98056097586828e-05	0.00360582445429852	LYST	lysosomal trafficking regulator [Source:HGNC Symbol;Acc:HGNC:1968]
ENSG00000139116	-1.02775	0.000114880602400253	0.00794779604211329	KIF21A	kinesin family member 21A [Source:HGNC Symbol;Acc:HGNC:19349]
ENSG00000166228	-1.02673	5.51004473891467e-05	0.00501209995510164	PCBD1	pterin-4 alpha-carbinolamine dehydratase 1 [Source:HGNC Symbol;Acc:HGNC:8646]
ENSG00000211584	-1.0122	1.00933511020137e-05	0.00177066216475326	SLC48A1	solute carrier family 48 member 1 [Source:HGNC Symbol;Acc:HGNC:26035]
ENSG00000125347	-0.996122	1.48357748430024e-05	0.00230126292722613	IRF1	interferon regulatory factor 1 [Source:HGNC Symbol;Acc:HGNC:6116]
ENSG00000109452	-0.945547	0.000368195516380205	0.0176626431204748	INPP4B	inositol polyphosphate-4-phosphatase type II B [Source:HGNC Symbol;Acc:HGNC:6075]
ENSG00000231312	-0.943899	0.000508361636211662	0.0215885218190635	MAP4K3-DT	MAP4K3 divergent transcript [Source:HGNC Symbol;Acc:HGNC:54056]
ENSG00000090520	-0.925035	0.000825590877794919	0.029457402361225	DNAJB11	DnaJ heat shock protein family (Hsp40) member B11 [Source:HGNC Symbol;Acc:HGNC:14889]
ENSG00000187601	-0.921886	0.00101709419000257	0.0333064444086176	MAGEH1	MAGE family member H1 [Source:HGNC Symbol;Acc:HGNC:24092]
ENSG00000070540	-0.920506	0.000841669203929542	0.0298863551544716	WIPI1	WD repeat domain, phosphoinositide interacting 1 [Source:HGNC Symbol;Acc:HGNC:25471]
ENSG00000175505	-0.907691	0.00085097917420722	0.030000069643822	CLCF1	cardiotrophin like cytokine factor 1 [Source:HGNC Symbol;Acc:HGNC:17412]
ENSG00000152990	-0.905439	0.00165093491198414	0.0447209133510999	ADGRA3	adhesion G protein-coupled receptor A3 [Source:HGNC Symbol;Acc:HGNC:13839]
ENSG00000130517	-0.901011	0.000137712423773253	0.00901924567432289	PGPEP1	pyroglutamyl-peptidase I [Source:HGNC Symbol;Acc:HGNC:13568]
ENSG00000171155	-0.889313	0.00148980320562192	0.0416579507363276	C1GALT1C1	C1GALT1 specific chaperone 1 [Source:HGNC Symbol;Acc:HGNC:24338]
ENSG00000134686	-0.854526	0.00174030563715745	0.0465481331369266	PHC2	polyhomeotic homolog 2 [Source:HGNC Symbol;Acc:HGNC:3183]
ENSG00000175455	-0.830698	0.000300646324090691	0.0156423634390855	CCDC14	coiled-coil domain containing 14 [Source:HGNC Symbol;Acc:HGNC:25766]
ENSG00000221963	-0.829949	0.000326879726482885	0.0162733096265263	APOL6	apolipoprotein L6 [Source:HGNC Symbol;Acc:HGNC:14870]
ENSG00000135931	-0.816037	0.000239214819051697	0.0132983506164787	ARMC9	armadillo repeat containing 9 [Source:HGNC Symbol;Acc:HGNC:20730]
ENSG00000182606	-0.79698	0.000634441794119024	0.0253465368583242	TRAK1	trafficking kinesin protein 1 [Source:HGNC Symbol;Acc:HGNC:29947]
ENSG00000153006	-0.795925	0.000715472900286613	0.0273849575548663	SREK1IP1	SREK1 interacting protein 1 [Source:HGNC Symbol;Acc:HGNC:26716]
ENSG00000162851	-0.766754	0.000214594534756538	0.0124990713998907	TFB2M	transcription factor B2, mitochondrial [Source:HGNC Symbol;Acc:HGNC:18559]
ENSG00000042286	-0.75083	0.000255577554407172	0.0139488549694225	AIFM2	apoptosis inducing factor mitochondria associated 2 [Source:HGNC Symbol;Acc:HGNC:21411]
ENSG00000112062	-0.712843	0.000306120934816535	0.0158280634928297	MAPK14	mitogen-activated protein kinase 14 [Source:HGNC Symbol;Acc:HGNC:6876]
ENSG00000105849	-0.703814	0.000178277551311944	0.0108881684265378	POLR1F	RNA polymerase I subunit F [Source:HGNC Symbol;Acc:HGNC:18027]
ENSG00000130150	-0.680719	0.00115439705434763	0.0362229398234779	MOSPD2	motile sperm domain containing 2 [Source:HGNC Symbol;Acc:HGNC:28381]
ENSG00000151491	-0.672906	5.71713507468943e-05	0.00510056533604447	EPS8	epidermal growth factor receptor pathway substrate 8 [Source:HGNC Symbol;Acc:HGNC:3420]
ENSG00000234456	-0.648263	0.00054106524081867	0.022459541940011	MAGI2-AS3	MAGI2 antisense RNA 3 [Source:HGNC Symbol;Acc:HGNC:40862]
ENSG00000106299	-0.637699	0.000805461138917864	0.0288790154333179	WASL	WASP like actin nucleation promoting factor [Source:HGNC Symbol;Acc:HGNC:12735]
ENSG00000040633	-0.631513	0.000737267307222675	0.0275686569395279	PHF23	PHD finger protein 23 [Source:HGNC Symbol;Acc:HGNC:28428]
ENSG00000105518	-0.628629	0.00096528820542531	0.0324020204900851	TMEM205	transmembrane protein 205 [Source:HGNC Symbol;Acc:HGNC:29631]
ENSG00000083223	-0.612807	0.00142702946701349	0.0405959579650788	TUT7	terminal uridylyl transferase 7 [Source:HGNC Symbol;Acc:HGNC:25817]
ENSG00000087157	-0.588322	0.00106752981556938	0.0344225806613357	PGS1	phosphatidylglycerophosphate synthase 1 [Source:HGNC Symbol;Acc:HGNC:30029]
ENSG00000095794	-0.563945	0.000337531418666217	0.0166908153874677	CREM	cAMP responsive element modulator [Source:HGNC Symbol;Acc:HGNC:2352]
ENSG00000128563	-0.560785	0.0010043481501828	0.0331097859979725	PRKRIP1	PRKR interacting protein 1 [Source:HGNC Symbol;Acc:HGNC:21894]
ENSG00000153250	-0.560098	0.00040201948512373	0.0186881991570451	RBMS1	RNA binding motif single stranded interacting protein 1 [Source:HGNC Symbol;Acc:HGNC:9907]
ENSG00000157181	-0.546924	0.00194812180242577	0.0494714904029398	ODR4	odr-4 GPCR localization factor homolog [Source:HGNC Symbol;Acc:HGNC:24299]
ENSG00000172466	-0.519821	0.00190737172759435	0.0489239893064968	ZNF24	zinc finger protein 24 [Source:HGNC Symbol;Acc:HGNC:13032]
ENSG00000182199	0.502338	0.000981976554860152	0.0327384762724416	SHMT2	serine hydroxymethyltransferase 2 [Source:HGNC Symbol;Acc:HGNC:10852]
ENSG00000167565	0.502498	0.00050117990410433	0.0214069190344389	SERTAD3	SERTA domain containing 3 [Source:HGNC Symbol;Acc:HGNC:17931]
ENSG00000182054	0.515191	0.00084843980369985	0.029982275653048	IDH2	isocitrate dehydrogenase (NADP(+)) 2 [Source:HGNC Symbol;Acc:HGNC:5383]
ENSG00000140950	0.53621	0.000128184600188895	0.00854718673476724	MEAK7	MTOR associated protein, eak-7 homolog [Source:HGNC Symbol;Acc:HGNC:29325]
ENSG00000160310	0.540138	0.000791937219597335	0.0286029089901626	PRMT2	protein arginine methyltransferase 2 [Source:HGNC Symbol;Acc:HGNC:5186]
ENSG00000131236	0.560995	0.00121730966458755	0.0371057048670937	CAP1	cyclase associated actin cytoskeleton regulatory protein 1 [Source:HGNC Symbol;Acc:HGNC:20040]
ENSG00000059573	0.56661	0.000209057229812439	0.0122977861074923	ALDH18A1	aldehyde dehydrogenase 18 family member A1 [Source:HGNC Symbol;Acc:HGNC:9722]
ENSG00000154845	0.577933	0.00125363688941829	0.0376244260742727	PPP4R1	protein phosphatase 4 regulatory subunit 1 [Source:HGNC Symbol;Acc:HGNC:9320]
ENSG00000177731	0.582481	0.000938996557102414	0.0319372883285714	FLII	FLII actin remodeling protein [Source:HGNC Symbol;Acc:HGNC:3750]
ENSG00000117758	0.58325	0.000615460486778433	0.0248477417347041	STX12	syntaxin 12 [Source:HGNC Symbol;Acc:HGNC:11430]
ENSG00000197712	0.58552	0.00150328358755143	0.0419552783071171	FAM114A1	family with sequence similarity 114 member A1 [Source:HGNC Symbol;Acc:HGNC:25087]
ENSG00000110047	0.594744	0.000549578449382745	0.0226217542740339	EHD1	EH domain containing 1 [Source:HGNC Symbol;Acc:HGNC:3242]
ENSG00000070756	0.605165	3.97445049828581e-05	0.00405418038698906	PABPC1	poly(A) binding protein cytoplasmic 1 [Source:HGNC Symbol;Acc:HGNC:8554]
ENSG00000137563	0.607409	0.00073512260582155	0.0275686569395279	GGH	gamma-glutamyl hydrolase [Source:HGNC Symbol;Acc:HGNC:4248]
ENSG00000103507	0.611628	4.94660217142182e-05	0.0047333201037709	BCKDK	branched chain keto acid dehydrogenase kinase [Source:HGNC Symbol;Acc:HGNC:16902]
ENSG00000136682	0.617068	0.00013575198789511	0.00895129472022242	CBWD2	COBW domain containing 2 [Source:HGNC Symbol;Acc:HGNC:17907]
ENSG00000100075	0.633422	0.000286849519959063	0.0151505896993432	SLC25A1	solute carrier family 25 member 1 [Source:HGNC Symbol;Acc:HGNC:10979]
ENSG00000171148	0.633567	4.55045373670544e-06	0.000980054005817521	TADA3	transcriptional adaptor 3 [Source:HGNC Symbol;Acc:HGNC:19422]
ENSG00000169299	0.636183	0.00130891811546205	0.0386746524121195	PGM2	phosphoglucomutase 2 [Source:HGNC Symbol;Acc:HGNC:8906]
ENSG00000168385	0.639592	0.00090702346259815	0.0315233437378451	SEPTIN2	septin 2 [Source:HGNC Symbol;Acc:HGNC:7729]
ENSG00000109184	0.63971	0.00152627170512112	0.0424361129182356	DCUN1D4	defective in cullin neddylation 1 domain containing 4 [Source:HGNC Symbol;Acc:HGNC:28998]
ENSG00000120913	0.649555	0.00181962821943836	0.0477696426248291	PDLIM2	PDZ and LIM domain 2 [Source:HGNC Symbol;Acc:HGNC:13992]
ENSG00000182718	0.656364	0.00085803234601504	0.0301046777401848	ANXA2	annexin A2 [Source:HGNC Symbol;Acc:HGNC:537]
ENSG00000125458	0.663917	0.000157708645544351	0.0100605826871929	NT5C	5', 3'-nucleotidase, cytosolic [Source:HGNC Symbol;Acc:HGNC:17144]
ENSG00000042493	0.667005	0.000387310051898826	0.0181764360661818	CAPG	capping actin protein, gelsolin like [Source:HGNC Symbol;Acc:HGNC:1474]
ENSG00000004059	0.673403	0.00118470708347448	0.0368799974139753	ARF5	ADP ribosylation factor 5 [Source:HGNC Symbol;Acc:HGNC:658]
ENSG00000164111	0.678265	0.000799728591662739	0.0287434159188832	ANXA5	annexin A5 [Source:HGNC Symbol;Acc:HGNC:543]
ENSG00000138594	0.681197	4.86902580727247e-05	0.00472039238789257	TMOD3	tropomodulin 3 [Source:HGNC Symbol;Acc:HGNC:11873]
ENSG00000132394	0.68458	0.00182831694085258	0.0477696426248291	EEFSEC	eukaryotic elongation factor, selenocysteine-tRNA specific [Source:HGNC Symbol;Acc:HGNC:24614]
ENSG00000177469	0.688557	0.00139606149822348	0.0401020706390277	CAVIN1	caveolae associated protein 1 [Source:HGNC Symbol;Acc:HGNC:9688]
ENSG00000197702	0.693824	3.08981040988612e-05	0.00370174359350259	PARVA	parvin alpha [Source:HGNC Symbol;Acc:HGNC:14652]
ENSG00000067082	0.694538	0.000927422864590573	0.0319310825528194	KLF6	Kruppel like factor 6 [Source:HGNC Symbol;Acc:HGNC:2235]
ENSG00000162458	0.695431	0.000496675844240895	0.0212762070951565	FBLIM1	filamin binding LIM protein 1 [Source:HGNC Symbol;Acc:HGNC:24686]
ENSG00000164024	0.706774	0.00189002572269033	0.0486912920446937	METAP1	methionyl aminopeptidase 1 [Source:HGNC Symbol;Acc:HGNC:15789]
ENSG00000148700	0.712009	2.64510293533007e-06	0.000683828716754805	ADD3	adducin 3 [Source:HGNC Symbol;Acc:HGNC:245]
ENSG00000044090	0.712862	0.000650246540264576	0.0257581532724161	CUL7	cullin 7 [Source:HGNC Symbol;Acc:HGNC:21024]
ENSG00000113580	0.71353	0.00152286452989237	0.0424214210066049	NR3C1	nuclear receptor subfamily 3 group C member 1 [Source:HGNC Symbol;Acc:HGNC:7978]
ENSG00000153904	0.719289	0.00114766881085718	0.0362229398234779	DDAH1	dimethylarginine dimethylaminohydrolase 1 [Source:HGNC Symbol;Acc:HGNC:2715]
ENSG00000213859	0.71953	0.00188995358728972	0.0486912920446937	KCTD11	potassium channel tetramerization domain containing 11 [Source:HGNC Symbol;Acc:HGNC:21302]
ENSG00000047849	0.728526	5.1974109645739e-08	4.16332899688586e-05	MAP4	microtubule associated protein 4 [Source:HGNC Symbol;Acc:HGNC:6862]
ENSG00000121481	0.728572	3.44830775074668e-05	0.00384956537992448	RNF2	ring finger protein 2 [Source:HGNC Symbol;Acc:HGNC:10061]
ENSG00000122729	0.739558	0.00196076377592734	0.0495605746176078	ACO1	aconitase 1 [Source:HGNC Symbol;Acc:HGNC:117]
ENSG00000130402	0.747609	0.000631781231402913	0.0253465368583242	ACTN4	actinin alpha 4 [Source:HGNC Symbol;Acc:HGNC:166]
ENSG00000124942	0.750759	3.94654605098263e-05	0.00405418038698906	AHNAK	AHNAK nucleoprotein [Source:HGNC Symbol;Acc:HGNC:347]
ENSG00000166974	0.752338	0.000937988083600133	0.0319372883285714	MAPRE2	microtubule associated protein RP/EB family member 2 [Source:HGNC Symbol;Acc:HGNC:6891]
ENSG00000231991	0.760315	0.000184760700592073	0.0111583347701835	ANXA2P2	annexin A2 pseudogene 2 [Source:HGNC Symbol;Acc:HGNC:539]
ENSG00000153767	0.763364	0.00010391509933895	0.0075063377640136	GTF2E1	general transcription factor IIE subunit 1 [Source:HGNC Symbol;Acc:HGNC:4650]
ENSG00000148484	0.768967	0.000507379786561116	0.0215885218190635	RSU1	Ras suppressor protein 1 [Source:HGNC Symbol;Acc:HGNC:10464]
ENSG00000005448	0.771081	0.000747425546981444	0.0275686569395279	WDR54	WD repeat domain 54 [Source:HGNC Symbol;Acc:HGNC:25770]
ENSG00000151239	0.780441	6.47172819755325e-05	0.00553249452235105	TWF1	twinfilin actin binding protein 1 [Source:HGNC Symbol;Acc:HGNC:9620]
ENSG00000155380	0.78868	6.18463456695823e-05	0.00542480803444622	SLC16A1	solute carrier family 16 member 1 [Source:HGNC Symbol;Acc:HGNC:10922]
ENSG00000112144	0.793101	0.00044398109078436	0.0195298667277562	CILK1	ciliogenesis associated kinase 1 [Source:HGNC Symbol;Acc:HGNC:21219]
ENSG00000071127	0.799763	6.14820497943147e-06	0.00117662270879094	WDR1	WD repeat domain 1 [Source:HGNC Symbol;Acc:HGNC:12754]
ENSG00000158122	0.803289	0.00125066345562958	0.0376244260742727	PRXL2C	peroxiredoxin like 2C [Source:HGNC Symbol;Acc:HGNC:16881]
ENSG00000113578	0.807738	0.00145214135932227	0.041072466546973	FGF1	fibroblast growth factor 1 [Source:HGNC Symbol;Acc:HGNC:3665]
ENSG00000176148	0.808083	0.000794149274347988	0.0286126740997358	TCP11L1	t-complex 11 like 1 [Source:HGNC Symbol;Acc:HGNC:25655]
ENSG00000188994	0.809325	2.28406076440359e-07	0.000101993695225004	ZNF292	zinc finger protein 292 [Source:HGNC Symbol;Acc:HGNC:18410]
ENSG00000169764	0.810525	2.85009086375028e-06	0.000724119637383173	UGP2	UDP-glucose pyrophosphorylase 2 [Source:HGNC Symbol;Acc:HGNC:12527]
ENSG00000177879	0.813177	3.92261969881938e-06	0.000870096653818387	AP3S1	adaptor related protein complex 3 subunit sigma 1 [Source:HGNC Symbol;Acc:HGNC:2013]
ENSG00000144635	0.8136	5.61313392374831e-05	0.00507454855830399	DYNC1LI1	dynein cytoplasmic 1 light intermediate chain 1 [Source:HGNC Symbol;Acc:HGNC:18745]
ENSG00000241839	0.815815	8.58962560647515e-05	0.00676880871320951	PLEKHO2	pleckstrin homology domain containing O2 [Source:HGNC Symbol;Acc:HGNC:30026]
ENSG00000026025	0.824035	0.000697468175061256	0.0269772809958854	VIM	vimentin [Source:HGNC Symbol;Acc:HGNC:12692]
ENSG00000231925	0.826505	0.000674098027422743	0.0264189056704828	TAPBP	TAP binding protein [Source:HGNC Symbol;Acc:HGNC:11566]
ENSG00000172081	0.82685	2.28284351993408e-07	0.000101993695225004	MOB3A	MOB kinase activator 3A [Source:HGNC Symbol;Acc:HGNC:29802]
ENSG00000166888	0.830951	0.000197862078986399	0.0118853341030933	STAT6	signal transducer and activator of transcription 6 [Source:HGNC Symbol;Acc:HGNC:11368]
ENSG00000166333	0.836775	0.00133631368838135	0.0392269293067483	ILK	integrin linked kinase [Source:HGNC Symbol;Acc:HGNC:6040]
ENSG00000112078	0.845416	0.00105321649236167	0.0340355224373719	KCTD20	potassium channel tetramerization domain containing 20 [Source:HGNC Symbol;Acc:HGNC:21052]
ENSG00000184014	0.84846	0.000968515705395412	0.0324364714425154	DENND5A	DENN domain containing 5A [Source:HGNC Symbol;Acc:HGNC:19344]
ENSG00000133142	0.852562	0.000371313197762971	0.0177076740525409	TCEAL4	transcription elongation factor A like 4 [Source:HGNC Symbol;Acc:HGNC:26121]
ENSG00000144579	0.854514	3.9560583473013e-06	0.000870096653818387	CTDSP1	CTD small phosphatase 1 [Source:HGNC Symbol;Acc:HGNC:21614]
ENSG00000176014	0.861608	0.000211809348315119	0.0123858037967127	TUBB6	tubulin beta 6 class V [Source:HGNC Symbol;Acc:HGNC:20776]
ENSG00000120860	0.863512	8.76474994020105e-07	0.000280776858953919	WASHC3	WASH complex subunit 3 [Source:HGNC Symbol;Acc:HGNC:24256]
ENSG00000167695	0.864787	2.04337116363831e-05	0.00289066193418228	TLCD3A	TLC domain containing 3A [Source:HGNC Symbol;Acc:HGNC:29646]
ENSG00000178209	0.866496	4.4858813580901e-05	0.00443650655656481	PLEC	plectin [Source:HGNC Symbol;Acc:HGNC:9069]
ENSG00000261801	0.866666	3.37008904910243e-05	0.00384956537992448	LOXL1-AS1	LOXL1 antisense RNA 1 [Source:HGNC Symbol;Acc:HGNC:44169]
ENSG00000072682	0.868397	0.00121872700567816	0.0371057048670937	P4HA2	prolyl 4-hydroxylase subunit alpha 2 [Source:HGNC Symbol;Acc:HGNC:8547]
ENSG00000050405	0.87564	0.000594295526362642	0.0241920963438671	LIMA1	LIM domain and actin binding 1 [Source:HGNC Symbol;Acc:HGNC:24636]
ENSG00000172037	0.876487	0.000728217337110213	0.0275686569395279	LAMB2	laminin subunit beta 2 [Source:HGNC Symbol;Acc:HGNC:6487]
ENSG00000175105	0.879974	9.43970062688221e-05	0.00713213023711606	ZNF654	zinc finger protein 654 [Source:HGNC Symbol;Acc:HGNC:25612]
ENSG00000085449	0.884028	0.000702648936978024	0.0271048048424661	WDFY1	WD repeat and FYVE domain containing 1 [Source:HGNC Symbol;Acc:HGNC:20451]
ENSG00000114480	0.884566	0.00156223969238157	0.0432171913964653	GBE1	1,4-alpha-glucan branching enzyme 1 [Source:HGNC Symbol;Acc:HGNC:4180]
ENSG00000133794	0.889383	0.000107003845454024	0.00758137940680187	ARNTL	aryl hydrocarbon receptor nuclear translocator like [Source:HGNC Symbol;Acc:HGNC:701]
ENSG00000157514	0.897167	5.25524611997225e-05	0.00493256731362491	TSC22D3	TSC22 domain family member 3 [Source:HGNC Symbol;Acc:HGNC:3051]
ENSG00000112773	0.897585	0.000239491363182363	0.0132983506164787	TENT5A	terminal nucleotidyltransferase 5A [Source:HGNC Symbol;Acc:HGNC:18345]
ENSG00000118263	0.910619	0.000745380117134385	0.0275686569395279	KLF7	Kruppel like factor 7 [Source:HGNC Symbol;Acc:HGNC:6350]
ENSG00000167460	0.913191	0.000540771417806453	0.022459541940011	TPM4	tropomyosin 4 [Source:HGNC Symbol;Acc:HGNC:12013]
ENSG00000175220	0.916894	2.985278117701e-05	0.00360582445429852	ARHGAP1	Rho GTPase activating protein 1 [Source:HGNC Symbol;Acc:HGNC:673]
ENSG00000174099	0.919457	0.00130962619120844	0.0386746524121195	MSRB3	methionine sulfoxide reductase B3 [Source:HGNC Symbol;Acc:HGNC:27375]
ENSG00000178802	0.919925	2.10341962678759e-05	0.00289682164676093	MPI	mannose phosphate isomerase [Source:HGNC Symbol;Acc:HGNC:7216]
ENSG00000197852	0.925092	0.000845825918223752	0.0299617565647721	INKA2	inka box actin regulator 2 [Source:HGNC Symbol;Acc:HGNC:28045]
ENSG00000196923	0.932284	0.000459018939565547	0.0200121393296979	PDLIM7	PDZ and LIM domain 7 [Source:HGNC Symbol;Acc:HGNC:22958]
ENSG00000163872	0.932333	2.60179838424974e-05	0.00337345903929825	YEATS2	YEATS domain containing 2 [Source:HGNC Symbol;Acc:HGNC:25489]
ENSG00000103145	0.938486	3.14094507853365e-05	0.00373265860300579	HCFC1R1	host cell factor C1 regulator 1 [Source:HGNC Symbol;Acc:HGNC:21198]
ENSG00000134369	0.950651	9.7476429545237e-05	0.00729143485166809	NAV1	neuron navigator 1 [Source:HGNC Symbol;Acc:HGNC:15989]
ENSG00000175115	0.950878	0.0019524202965731	0.0494714904029398	PACS1	phosphofurin acidic cluster sorting protein 1 [Source:HGNC Symbol;Acc:HGNC:30032]
ENSG00000138119	0.951136	0.000944941484205831	0.0319372883285714	MYOF	myoferlin [Source:HGNC Symbol;Acc:HGNC:3656]
ENSG00000065150	0.953014	0.000279045780597144	0.0148448325735722	IPO5	importin 5 [Source:HGNC Symbol;Acc:HGNC:6402]
ENSG00000116133	0.963808	0.00123348491104454	0.0373236830578075	DHCR24	24-dehydrocholesterol reductase [Source:HGNC Symbol;Acc:HGNC:2859]
ENSG00000115866	0.968665	2.81606783637225e-05	0.00348719122998164	DARS1	aspartyl-tRNA synthetase 1 [Source:HGNC Symbol;Acc:HGNC:2678]
ENSG00000163516	0.971314	0.000820088005815528	0.0293320797419845	ANKZF1	ankyrin repeat and zinc finger peptidyl tRNA hydrolase 1 [Source:HGNC Symbol;Acc:HGNC:25527]
ENSG00000136997	0.971372	0.000301467916442745	0.0156423634390855	MYC	MYC proto-oncogene, bHLH transcription factor [Source:HGNC Symbol;Acc:HGNC:7553]
ENSG00000240356	0.975765	4.13222217630365e-08	3.5819074111771e-05	RPL23AP7	ribosomal protein L23a pseudogene 7 [Source:HGNC Symbol;Acc:HGNC:17336]
ENSG00000126458	0.982321	0.000429649238183385	0.0194187305688693	RRAS	RAS related [Source:HGNC Symbol;Acc:HGNC:10447]
ENSG00000186314	0.98611	0.000244715788215616	0.0135061118170237	PRELID2	PRELI domain containing 2 [Source:HGNC Symbol;Acc:HGNC:28306]
ENSG00000111186	0.989879	0.000216732032812358	0.0125738710059957	WNT5B	Wnt family member 5B [Source:HGNC Symbol;Acc:HGNC:16265]
ENSG00000163430	1.02361	0.00128021121794082	0.0382005466421379	FSTL1	follistatin like 1 [Source:HGNC Symbol;Acc:HGNC:3972]
ENSG00000137267	1.02778	0.000108607301607536	0.00758809318143927	TUBB2A	tubulin beta 2A class IIa [Source:HGNC Symbol;Acc:HGNC:12412]
ENSG00000148180	1.04053	0.00122577802924981	0.0372434330701551	GSN	gelsolin [Source:HGNC Symbol;Acc:HGNC:4620]
ENSG00000156515	1.04721	0.000334961701743564	0.0166195139289332	HK1	hexokinase 1 [Source:HGNC Symbol;Acc:HGNC:4922]
ENSG00000005020	1.05695	0.00138853354528426	0.0399797505471866	SKAP2	src kinase associated phosphoprotein 2 [Source:HGNC Symbol;Acc:HGNC:15687]
ENSG00000291064	1.06686	2.98518354470136e-05	0.00360582445429852	RPL23AP7	ribosomal protein L23a pseudogene 7 [Source:NCBI gene (formerly Entrezgene);Acc:118433]
ENSG00000159208	1.07168	0.00115495226289621	0.0362229398234779	CIART	circadian associated repressor of transcription [Source:HGNC Symbol;Acc:HGNC:25200]
ENSG00000122042	1.07905	0.000317673718598479	0.015976075492617	UBL3	ubiquitin like 3 [Source:HGNC Symbol;Acc:HGNC:12504]
ENSG00000071967	1.09037	0.00031551954246076	0.015976075492617	CYBRD1	cytochrome b reductase 1 [Source:HGNC Symbol;Acc:HGNC:20797]
ENSG00000072195	1.09262	0.00134232551842395	0.0393250672753385	SPEG	striated muscle enriched protein kinase [Source:HGNC Symbol;Acc:HGNC:16901]
ENSG00000135362	1.09316	9.63936206900639e-07	0.000295958282824629	PRR5L	proline rich 5 like [Source:HGNC Symbol;Acc:HGNC:25878]
ENSG00000140682	1.09664	2.54836608214862e-06	0.000670584331902536	TGFB1I1	transforming growth factor beta 1 induced transcript 1 [Source:HGNC Symbol;Acc:HGNC:11767]
ENSG00000079308	1.09817	0.000447663902722957	0.0196332597337068	TNS1	tensin 1 [Source:HGNC Symbol;Acc:HGNC:11973]
ENSG00000149591	1.10675	0.000658147740518446	0.0259414508024707	TAGLN	transgelin [Source:HGNC Symbol;Acc:HGNC:11553]
ENSG00000147065	1.10743	3.40362263850253e-05	0.00384956537992448	MSN	moesin [Source:HGNC Symbol;Acc:HGNC:7373]
ENSG00000148848	1.1127	0.00178133971539619	0.047211910154817	ADAM12	ADAM metallopeptidase domain 12 [Source:HGNC Symbol;Acc:HGNC:190]
ENSG00000145012	1.11374	0.00116424136350544	0.0364129929531381	LPP	LIM domain containing preferred translocation partner in lipoma [Source:HGNC Symbol;Acc:HGNC:6679]
ENSG00000082512	1.11743	0.000167633344645299	0.0104671396893776	TRAF5	TNF receptor associated factor 5 [Source:HGNC Symbol;Acc:HGNC:12035]
ENSG00000077713	1.1194	0.00104159903179002	0.0339162521082855	SLC25A43	solute carrier family 25 member 43 [Source:HGNC Symbol;Acc:HGNC:30557]
ENSG00000111640	1.13407	0.000743826523928783	0.0275686569395279	GAPDH	glyceraldehyde-3-phosphate dehydrogenase [Source:HGNC Symbol;Acc:HGNC:4141]
ENSG00000172380	1.14574	7.24733759519794e-05	0.00586795421993609	GNG12	G protein subunit gamma 12 [Source:HGNC Symbol;Acc:HGNC:19663]
ENSG00000151414	1.14864	0.00178931328845839	0.0472532627575679	NEK7	NIMA related kinase 7 [Source:HGNC Symbol;Acc:HGNC:13386]
ENSG00000024422	1.15793	1.82769255943909e-07	9.63905463387453e-05	EHD2	EH domain containing 2 [Source:HGNC Symbol;Acc:HGNC:3243]
ENSG00000173641	1.1635	0.00145588653906762	0.0410995096545987	HSPB7	heat shock protein family B (small) member 7 [Source:HGNC Symbol;Acc:HGNC:5249]
ENSG00000269378	1.18123	9.15712021872469e-05	0.00704380792664782	ITGB1P1	integrin subunit beta 1 pseudogene 1 [Source:HGNC Symbol;Acc:HGNC:3781]
ENSG00000002834	1.18543	2.96483436770721e-07	0.000118080538493334	LASP1	LIM and SH3 protein 1 [Source:HGNC Symbol;Acc:HGNC:6513]
ENSG00000160285	1.18821	0.000300839041162091	0.0156423634390855	LSS	lanosterol synthase [Source:HGNC Symbol;Acc:HGNC:6708]
ENSG00000067225	1.19311	0.000106606692344993	0.00758137940680187	PKM	pyruvate kinase M1/2 [Source:HGNC Symbol;Acc:HGNC:9021]
ENSG00000164930	1.20227	0.00130683162418834	0.0386746524121195	FZD6	frizzled class receptor 6 [Source:HGNC Symbol;Acc:HGNC:4044]
ENSG00000196639	1.21083	9.20559447501092e-06	0.00167473629856495	HRH1	histamine receptor H1 [Source:HGNC Symbol;Acc:HGNC:5182]
ENSG00000187688	1.22201	0.000147016250351876	0.00950189239116336	TRPV2	transient receptor potential cation channel subfamily V member 2 [Source:HGNC Symbol;Acc:HGNC:18082]
ENSG00000168615	1.22204	0.000697498918256808	0.0269772809958854	ADAM9	ADAM metallopeptidase domain 9 [Source:HGNC Symbol;Acc:HGNC:216]
ENSG00000116774	1.22532	0.00108176760444174	0.0347296893661295	OLFML3	olfactomedin like 3 [Source:HGNC Symbol;Acc:HGNC:24956]
ENSG00000169504	1.2257	0.000205554804499348	0.0122247064357871	CLIC4	chloride intracellular channel 4 [Source:HGNC Symbol;Acc:HGNC:13518]
ENSG00000144810	1.22805	0.00100090394151037	0.0330702252961811	COL8A1	collagen type VIII alpha 1 chain [Source:HGNC Symbol;Acc:HGNC:2215]
ENSG00000106617	1.22814	0.000963104719555937	0.0324020204900851	PRKAG2	protein kinase AMP-activated non-catalytic subunit gamma 2 [Source:HGNC Symbol;Acc:HGNC:9386]
ENSG00000173281	1.22878	0.000532630597871029	0.022297853665419	PPP1R3B	protein phosphatase 1 regulatory subunit 3B [Source:HGNC Symbol;Acc:HGNC:14942]
ENSG00000150093	1.23025	8.42703466047562e-07	0.000275957295015042	ITGB1	integrin subunit beta 1 [Source:HGNC Symbol;Acc:HGNC:6153]
ENSG00000038427	1.24258	5.50346956398431e-05	0.00501209995510164	VCAN	versican [Source:HGNC Symbol;Acc:HGNC:2464]
ENSG00000197355	1.24318	5.15486672423407e-06	0.00105502938955991	UAP1L1	UDP-N-acetylglucosamine pyrophosphorylase 1 like 1 [Source:HGNC Symbol;Acc:HGNC:28082]
ENSG00000169715	1.24386	0.000315035367031881	0.015976075492617	MT1E	metallothionein 1E [Source:HGNC Symbol;Acc:HGNC:7397]
ENSG00000141959	1.24684	6.2447704499914e-05	0.005445144221957	PFKL	phosphofructokinase, liver type [Source:HGNC Symbol;Acc:HGNC:8876]
ENSG00000186297	1.24917	0.000166532306526908	0.0104671396893776	GABRA5	gamma-aminobutyric acid type A receptor subunit alpha5 [Source:HGNC Symbol;Acc:HGNC:4079]
ENSG00000101871	1.26818	0.00184055468465863	0.0480042722710258	MID1	midline 1 [Source:HGNC Symbol;Acc:HGNC:7095]
ENSG00000072786	1.26854	3.38367998149274e-05	0.00384956537992448	STK10	serine/threonine kinase 10 [Source:HGNC Symbol;Acc:HGNC:11388]
ENSG00000100504	1.27192	0.000177587666307625	0.0108881684265378	PYGL	glycogen phosphorylase L [Source:HGNC Symbol;Acc:HGNC:9725]
ENSG00000073712	1.274	0.000474647776844398	0.0204514901742078	FERMT2	FERM domain containing kindlin 2 [Source:HGNC Symbol;Acc:HGNC:15767]
ENSG00000125675	1.2796	0.00113824620568915	0.0361491294979209	GRIA3	glutamate ionotropic receptor AMPA type subunit 3 [Source:HGNC Symbol;Acc:HGNC:4573]
ENSG00000135048	1.27979	0.000126014834091432	0.00851814034482267	CEMIP2	cell migration inducing hyaluronidase 2 [Source:HGNC Symbol;Acc:HGNC:11869]
ENSG00000102024	1.29729	1.19335937473787e-09	1.4654453121781e-06	PLS3	plastin 3 [Source:HGNC Symbol;Acc:HGNC:9091]
ENSG00000173210	1.30394	0.000364474235201636	0.0176626431204748	ABLIM3	actin binding LIM protein family member 3 [Source:HGNC Symbol;Acc:HGNC:29132]
ENSG00000196924	1.30827	2.1591723009509e-06	0.000589214130126158	FLNA	filamin A [Source:HGNC Symbol;Acc:HGNC:3754]
ENSG00000112378	1.31594	3.91299401680115e-05	0.00405418038698906	PERP	p53 apoptosis effector related to PMP22 [Source:HGNC Symbol;Acc:HGNC:17637]
ENSG00000156535	1.32026	2.72669034025953e-05	0.00340512786898851	CD109	CD109 molecule [Source:HGNC Symbol;Acc:HGNC:21685]
ENSG00000131473	1.32885	4.62233252610373e-05	0.00451090676189832	ACLY	ATP citrate lyase [Source:HGNC Symbol;Acc:HGNC:115]
ENSG00000105220	1.33106	9.95841021596157e-05	0.00737611680609815	GPI	glucose-6-phosphate isomerase [Source:HGNC Symbol;Acc:HGNC:4458]
ENSG00000135074	1.33283	0.000590039844321358	0.0240860973996834	ADAM19	ADAM metallopeptidase domain 19 [Source:HGNC Symbol;Acc:HGNC:197]
ENSG00000128591	1.33612	6.24783324211471e-10	9.20680706558023e-07	FLNC	filamin C [Source:HGNC Symbol;Acc:HGNC:3756]
ENSG00000100345	1.3426	2.60976065743757e-05	0.00337345903929825	MYH9	myosin heavy chain 9 [Source:HGNC Symbol;Acc:HGNC:7579]
ENSG00000253873	1.35995	0.00118805193379177	0.0368799974139753	PCDHGA11	protocadherin gamma subfamily A, 11 [Source:HGNC Symbol;Acc:HGNC:8698]
ENSG00000197930	1.36176	7.75919722811147e-05	0.00624806176794812	ERO1A	endoplasmic reticulum oxidoreductase 1 alpha [Source:HGNC Symbol;Acc:HGNC:13280]
ENSG00000134668	1.36933	4.90585345458432e-05	0.00472501022919964	SPOCD1	SPOC domain containing 1 [Source:HGNC Symbol;Acc:HGNC:26338]
ENSG00000105976	1.36976	8.11241334148471e-08	5.1975879565269e-05	MET	MET proto-oncogene, receptor tyrosine kinase [Source:HGNC Symbol;Acc:HGNC:7029]
ENSG00000110328	1.37539	6.60881069766137e-06	0.00124855685180433	GALNT18	polypeptide N-acetylgalactosaminyltransferase 18 [Source:HGNC Symbol;Acc:HGNC:30488]
ENSG00000117143	1.37547	1.56308154927473e-08	1.43959810688203e-05	UAP1	UDP-N-acetylglucosamine pyrophosphorylase 1 [Source:HGNC Symbol;Acc:HGNC:12457]
ENSG00000129038	1.37783	0.00144751986516709	0.0410204860251967	LOXL1	lysyl oxidase like 1 [Source:HGNC Symbol;Acc:HGNC:6665]
ENSG00000158710	1.38529	6.33812099110829e-08	4.44755004404627e-05	TAGLN2	transgelin 2 [Source:HGNC Symbol;Acc:HGNC:11554]
ENSG00000137285	1.39272	0.000458881354078002	0.0200121393296979	TUBB2B	tubulin beta 2B class IIb [Source:HGNC Symbol;Acc:HGNC:30829]
ENSG00000187800	1.39518	0.00138909013844731	0.0399797505471866	PEAR1	platelet endothelial aggregation receptor 1 [Source:HGNC Symbol;Acc:HGNC:33631]
ENSG00000187498	1.39763	6.79034746134886e-05	0.00565016055355299	COL4A1	collagen type IV alpha 1 chain [Source:HGNC Symbol;Acc:HGNC:2202]
ENSG00000050165	1.40397	3.25242550684415e-05	0.00381103112307412	DKK3	dickkopf WNT signaling pathway inhibitor 3 [Source:HGNC Symbol;Acc:HGNC:2893]
ENSG00000161638	1.40693	5.36802734397607e-08	4.16332899688586e-05	ITGA5	integrin subunit alpha 5 [Source:HGNC Symbol;Acc:HGNC:6141]
ENSG00000074800	1.41817	0.00014081463864921	0.0091816128988264	ENO1	enolase 1 [Source:HGNC Symbol;Acc:HGNC:3350]
ENSG00000164692	1.43344	0.000751964724331432	0.0276294715288636	COL1A2	collagen type I alpha 2 chain [Source:HGNC Symbol;Acc:HGNC:2198]
ENSG00000092820	1.43694	2.00226404013191e-07	9.63905463387453e-05	EZR	ezrin [Source:HGNC Symbol;Acc:HGNC:12691]
ENSG00000197043	1.44104	4.32650620468386e-09	4.90426118709395e-06	ANXA6	annexin A6 [Source:HGNC Symbol;Acc:HGNC:544]
ENSG00000104812	1.4446	2.36795438566295e-12	5.8156959711882e-09	GYS1	glycogen synthase 1 [Source:HGNC Symbol;Acc:HGNC:4706]
ENSG00000163359	1.45142	5.31150811289081e-05	0.00495382174376956	COL6A3	collagen type VI alpha 3 chain [Source:HGNC Symbol;Acc:HGNC:2213]
ENSG00000196968	1.45171	0.00168432106044607	0.0454581596094017	FUT11	fucosyltransferase 11 [Source:HGNC Symbol;Acc:HGNC:19233]
ENSG00000168542	1.465	3.43664915004314e-06	0.000816813901210253	COL3A1	collagen type III alpha 1 chain [Source:HGNC Symbol;Acc:HGNC:2201]
ENSG00000159176	1.46909	0.000404399082291665	0.0187397008699685	CSRP1	cysteine and glycine rich protein 1 [Source:HGNC Symbol;Acc:HGNC:2469]
ENSG00000196155	1.49023	0.000177747307227967	0.0108881684265378	PLEKHG4	pleckstrin homology and RhoGEF domain containing G4 [Source:HGNC Symbol;Acc:HGNC:24501]
ENSG00000137501	1.49192	0.00158258821581679	0.0432171913964653	SYTL2	synaptotagmin like 2 [Source:HGNC Symbol;Acc:HGNC:15585]
ENSG00000146197	1.49805	0.000933826362491298	0.0319372883285714	SCUBE3	signal peptide, CUB domain and EGF like domain containing 3 [Source:HGNC Symbol;Acc:HGNC:13655]
ENSG00000166147	1.50193	0.000729652015119816	0.0275686569395279	FBN1	fibrillin 1 [Source:HGNC Symbol;Acc:HGNC:3603]
ENSG00000174945	1.50768	2.72400384741434e-05	0.00340512786898851	AMZ1	archaelysin family metallopeptidase 1 [Source:HGNC Symbol;Acc:HGNC:22231]
ENSG00000114023	1.51118	1.91085572792914e-05	0.00278795742641226	FAM162A	family with sequence similarity 162 member A [Source:HGNC Symbol;Acc:HGNC:17865]
ENSG00000108821	1.5128	1.4396561210878e-05	0.00225689070216488	COL1A1	collagen type I alpha 1 chain [Source:HGNC Symbol;Acc:HGNC:2197]
ENSG00000007255	1.51882	0.00158662462985123	0.0432171913964653	TRAPPC6A	trafficking protein particle complex subunit 6A [Source:HGNC Symbol;Acc:HGNC:23069]
ENSG00000277586	1.52251	0.000744480485060434	0.0275686569395279	NEFL	neurofilament light chain [Source:HGNC Symbol;Acc:HGNC:7739]
ENSG00000151882	1.5277	0.0016023749358379	0.0435656772223383	CCL28	C-C motif chemokine ligand 28 [Source:HGNC Symbol;Acc:HGNC:17700]
ENSG00000226415	1.53264	0.000439315599022741	0.0195244153580053	TPI1P1	triosephosphate isomerase 1 pseudogene 1 [Source:HGNC Symbol;Acc:HGNC:35449]
ENSG00000134013	1.54166	5.69009659780011e-06	0.0011330981549349	LOXL2	lysyl oxidase like 2 [Source:HGNC Symbol;Acc:HGNC:6666]
ENSG00000127990	1.54509	0.000263908316280659	0.0143503798845454	SGCE	sarcoglycan epsilon [Source:HGNC Symbol;Acc:HGNC:10808]
ENSG00000253159	1.55579	2.70938064054108e-05	0.00340512786898851	PCDHGA12	protocadherin gamma subfamily A, 12 [Source:HGNC Symbol;Acc:HGNC:8699]
ENSG00000135269	1.56044	9.6021626017425e-06	0.00172106011367476	TES	testin LIM domain protein [Source:HGNC Symbol;Acc:HGNC:14620]
ENSG00000277758	1.56667	0.00026982450377014	0.0144586686820247	SYT15B	synaptotagmin 15B [Source:HGNC Symbol;Acc:HGNC:51487]
ENSG00000223485	1.57497	0.000615193192438679	0.0248477417347041	LINC01615	long intergenic non-protein coding RNA 1615 [Source:HGNC Symbol;Acc:HGNC:51898]
ENSG00000117394	1.59067	0.00157968272156775	0.0432171913964653	SLC2A1	solute carrier family 2 member 1 [Source:HGNC Symbol;Acc:HGNC:11005]
ENSG00000105974	1.61383	1.03618450049092e-05	0.0017754900929342	CAV1	caveolin 1 [Source:HGNC Symbol;Acc:HGNC:1527]
ENSG00000142197	1.61624	0.00109521502324138	0.0350088689424837	DOP1B	DOP1 leucine zipper like protein B [Source:HGNC Symbol;Acc:HGNC:1291]
ENSG00000019549	1.61889	2.77346285599143e-07	0.000113527079571916	SNAI2	snail family transcriptional repressor 2 [Source:HGNC Symbol;Acc:HGNC:11094]
ENSG00000134516	1.62016	6.42456004203059e-05	0.00553249452235105	DOCK2	dedicator of cytokinesis 2 [Source:HGNC Symbol;Acc:HGNC:2988]
ENSG00000149294	1.62237	1.39755510425393e-05	0.00221444860390171	NCAM1	neural cell adhesion molecule 1 [Source:HGNC Symbol;Acc:HGNC:7656]
ENSG00000119938	1.62953	1.75666719768503e-06	0.000488419770284653	PPP1R3C	protein phosphatase 1 regulatory subunit 3C [Source:HGNC Symbol;Acc:HGNC:9293]
ENSG00000104490	1.63044	0.000178809497775661	0.0108881684265378	NCALD	neurocalcin delta [Source:HGNC Symbol;Acc:HGNC:7655]
ENSG00000095637	1.64616	0.00185157010504037	0.0481603916066538	SORBS1	sorbin and SH3 domain containing 1 [Source:HGNC Symbol;Acc:HGNC:14565]
ENSG00000111669	1.68674	3.79630465979335e-05	0.0039919260010615	TPI1	triosephosphate isomerase 1 [Source:HGNC Symbol;Acc:HGNC:12009]
ENSG00000100739	1.68988	0.000318740919844557	0.015976075492617	BDKRB1	bradykinin receptor B1 [Source:HGNC Symbol;Acc:HGNC:1029]
ENSG00000163110	1.69083	7.87333443571338e-06	0.00146862602841358	PDLIM5	PDZ and LIM domain 5 [Source:HGNC Symbol;Acc:HGNC:17468]
ENSG00000008517	1.70952	0.0019223904805425	0.0491811564605457	IL32	interleukin 32 [Source:HGNC Symbol;Acc:HGNC:16830]
ENSG00000166923	1.70959	4.45410201463291e-05	0.00443484103294801	GREM1	gremlin 1, DAN family BMP antagonist [Source:HGNC Symbol;Acc:HGNC:2001]
ENSG00000180611	1.71784	0.000424480927767789	0.0193060214555128	MB21D2	Mab-21 domain containing 2 [Source:HGNC Symbol;Acc:HGNC:30438]
ENSG00000114268	1.72306	0.000442135896911676	0.0195244153580053	PFKFB4	6-phosphofructo-2-kinase/fructose-2,6-biphosphatase 4 [Source:HGNC Symbol;Acc:HGNC:8875]
ENSG00000128340	1.73626	1.19640229781079e-05	0.00195890936228219	RAC2	Rac family small GTPase 2 [Source:HGNC Symbol;Acc:HGNC:9802]
ENSG00000179715	1.73751	1.96247449472081e-07	9.63905463387453e-05	PCED1B	PC-esterase domain containing 1B [Source:HGNC Symbol;Acc:HGNC:28255]
ENSG00000122884	1.73979	4.81445182449765e-06	0.000999236085715456	P4HA1	prolyl 4-hydroxylase subunit alpha 1 [Source:HGNC Symbol;Acc:HGNC:8546]
ENSG00000188153	1.74193	0.00146223429979569	0.0411997794298074	COL4A5	collagen type IV alpha 5 chain [Source:HGNC Symbol;Acc:HGNC:2207]
ENSG00000117152	1.7517	0.000369170336665734	0.0176626431204748	RGS4	regulator of G protein signaling 4 [Source:HGNC Symbol;Acc:HGNC:10000]
ENSG00000113657	1.76659	0.000366756501227977	0.0176626431204748	DPYSL3	dihydropyrimidinase like 3 [Source:HGNC Symbol;Acc:HGNC:3015]
ENSG00000113083	1.77848	1.05420940760931e-15	5.56523438154682e-12	LOX	lysyl oxidase [Source:HGNC Symbol;Acc:HGNC:6664]
ENSG00000173848	1.77872	1.30295310855678e-05	0.00210992494590031	NET1	neuroepithelial cell transforming 1 [Source:HGNC Symbol;Acc:HGNC:14592]
ENSG00000130176	1.78537	0.000748334878923125	0.0275686569395279	CNN1	calponin 1 [Source:HGNC Symbol;Acc:HGNC:2155]
ENSG00000091986	1.79673	0.00104262094225389	0.0339162521082855	CCDC80	coiled-coil domain containing 80 [Source:HGNC Symbol;Acc:HGNC:30649]
ENSG00000060982	1.80519	3.6113463892202e-06	0.000831512506117952	BCAT1	branched chain amino acid transaminase 1 [Source:HGNC Symbol;Acc:HGNC:976]
ENSG00000179546	1.81839	0.00143046392792121	0.0406152532598208	HTR1D	5-hydroxytryptamine receptor 1D [Source:HGNC Symbol;Acc:HGNC:5289]
ENSG00000231672	1.82179	9.13575563187616e-06	0.00167473629856495	DIRC3	disrupted in renal carcinoma 3 [Source:HGNC Symbol;Acc:HGNC:17805]
ENSG00000164932	1.84403	5.94689261137188e-08	4.3816704760588e-05	CTHRC1	collagen triple helix repeat containing 1 [Source:HGNC Symbol;Acc:HGNC:18831]
ENSG00000134986	1.84644	0.000766510630890414	0.0278896312513609	NREP	neuronal regeneration related protein [Source:HGNC Symbol;Acc:HGNC:16834]
ENSG00000078053	1.86164	0.000349824311252146	0.0171660716308967	AMPH	amphiphysin [Source:HGNC Symbol;Acc:HGNC:471]
ENSG00000173546	1.86554	3.72813507310752e-05	0.0039919260010615	CSPG4	chondroitin sulfate proteoglycan 4 [Source:HGNC Symbol;Acc:HGNC:2466]
ENSG00000139211	1.89098	5.99882709023394e-07	0.000220996790004218	AMIGO2	adhesion molecule with Ig like domain 2 [Source:HGNC Symbol;Acc:HGNC:24073]
ENSG00000214106	1.89239	0.0012021265105452	0.0371057048670937	PAXIP1-AS2	PAXIP1 antisense RNA 2 [Source:HGNC Symbol;Acc:HGNC:48958]
ENSG00000149571	1.90916	0.00142186659531372	0.0405273233047253	KIRREL3	kirre like nephrin family adhesion molecule 3 [Source:HGNC Symbol;Acc:HGNC:23204]
ENSG00000122420	1.91175	0.000921649444772715	0.0318812822022787	PTGFR	prostaglandin F receptor [Source:HGNC Symbol;Acc:HGNC:9600]
ENSG00000186340	1.91831	7.49851935143468e-09	7.89272722591011e-06	THBS2	thrombospondin 2 [Source:HGNC Symbol;Acc:HGNC:11786]
ENSG00000170961	1.93374	0.000162923765987275	0.0103040541441566	HAS2	hyaluronan synthase 2 [Source:HGNC Symbol;Acc:HGNC:4819]
ENSG00000104881	1.94598	1.94969869512178e-07	9.63905463387453e-05	PPP1R13L	protein phosphatase 1 regulatory subunit 13 like [Source:HGNC Symbol;Acc:HGNC:18838]
ENSG00000165072	1.95232	0.000317419973347235	0.015976075492617	MAMDC2	MAM domain containing 2 [Source:HGNC Symbol;Acc:HGNC:23673]
ENSG00000135636	1.95975	0.00118878927603408	0.0368799974139753	DYSF	dysferlin [Source:HGNC Symbol;Acc:HGNC:3097]
ENSG00000005379	1.97238	0.000981702354822238	0.0327384762724416	TSPOAP1	TSPO associated protein 1 [Source:HGNC Symbol;Acc:HGNC:16831]
ENSG00000049759	1.97467	0.000121866498989498	0.0082756899958951	NEDD4L	NEDD4 like E3 ubiquitin protein ligase [Source:HGNC Symbol;Acc:HGNC:7728]
ENSG00000105889	1.97551	0.000127110813213261	0.00854718673476724	STEAP1B	STEAP family member 1B [Source:HGNC Symbol;Acc:HGNC:41907]
ENSG00000164211	1.99086	0.000235856576384751	0.0132983506164787	STARD4	StAR related lipid transfer domain containing 4 [Source:HGNC Symbol;Acc:HGNC:18058]
ENSG00000118515	1.99713	4.75044856389522e-06	0.000999236085715456	SGK1	serum/glucocorticoid regulated kinase 1 [Source:HGNC Symbol;Acc:HGNC:10810]
ENSG00000115738	2.01324	9.64033494542765e-07	0.000295958282824629	ID2	inhibitor of DNA binding 2 [Source:HGNC Symbol;Acc:HGNC:5361]
ENSG00000102144	2.02356	2.07047303241492e-05	0.00289066193418228	PGK1	phosphoglycerate kinase 1 [Source:HGNC Symbol;Acc:HGNC:8896]
ENSG00000061656	2.03862	0.000543053073221235	0.0224787361994048	SPAG4	sperm associated antigen 4 [Source:HGNC Symbol;Acc:HGNC:11214]
ENSG00000079739	2.0446	2.61174444294155e-07	0.000109961903174819	PGM1	phosphoglucomutase 1 [Source:HGNC Symbol;Acc:HGNC:8905]
ENSG00000064225	2.05107	3.61353348170525e-05	0.00391536980782416	ST3GAL6	ST3 beta-galactoside alpha-2,3-sialyltransferase 6 [Source:HGNC Symbol;Acc:HGNC:18080]
ENSG00000082482	2.05831	0.001021886480579	0.0333891777778541	KCNK2	potassium two pore domain channel subfamily K member 2 [Source:HGNC Symbol;Acc:HGNC:6277]
ENSG00000135919	2.06812	0.000155789555523852	0.010017676052406	SERPINE2	serpin family E member 2 [Source:HGNC Symbol;Acc:HGNC:8951]
ENSG00000118503	2.07033	0.000218568676711521	0.0125813594532069	TNFAIP3	TNF alpha induced protein 3 [Source:HGNC Symbol;Acc:HGNC:11896]
ENSG00000134594	2.07175	0.00039123042173819	0.0183021317293142	RAB33A	RAB33A, member RAS oncogene family [Source:HGNC Symbol;Acc:HGNC:9773]
ENSG00000152049	2.09598	1.07904203952375e-05	0.00181801353818009	KCNE4	potassium voltage-gated channel subfamily E regulatory subunit 4 [Source:HGNC Symbol;Acc:HGNC:6244]
ENSG00000134333	2.10711	2.89938717618716e-06	0.000724158803869389	LDHA	lactate dehydrogenase A [Source:HGNC Symbol;Acc:HGNC:6535]
ENSG00000183671	2.14475	6.5256879094152e-05	0.00553249452235105	CMKLR2	chemerin chemokine-like receptor 2 [Source:HGNC Symbol;Acc:HGNC:4463]
ENSG00000163827	2.15453	0.000115802492202623	0.00797413796774699	LRRC2	leucine rich repeat containing 2 [Source:HGNC Symbol;Acc:HGNC:14676]
ENSG00000164096	2.17402	1.26538533477135e-14	4.66167957329764e-11	C4orf3	chromosome 4 open reading frame 3 [Source:HGNC Symbol;Acc:HGNC:19225]
ENSG00000169994	2.20169	0.00158657385032969	0.0432171913964653	MYO7B	myosin VIIB [Source:HGNC Symbol;Acc:HGNC:7607]
ENSG00000102048	2.20409	0.00195355515655347	0.0494714904029398	ASB9	ankyrin repeat and SOCS box containing 9 [Source:HGNC Symbol;Acc:HGNC:17184]
ENSG00000099194	2.21183	4.09744969804104e-05	0.00410748426873012	SCD	stearoyl-CoA desaturase [Source:HGNC Symbol;Acc:HGNC:10571]
ENSG00000197093	2.2192	1.76782494213971e-05	0.00260506683473708	GAL3ST4	galactose-3-O-sulfotransferase 4 [Source:HGNC Symbol;Acc:HGNC:24145]
ENSG00000120658	2.22802	0.000590057082063362	0.0240860973996834	ENOX1	ecto-NOX disulfide-thiol exchanger 1 [Source:HGNC Symbol;Acc:HGNC:25474]
ENSG00000152952	2.22856	9.53966197801609e-08	5.62305835632181e-05	PLOD2	procollagen-lysine,2-oxoglutarate 5-dioxygenase 2 [Source:HGNC Symbol;Acc:HGNC:9082]
ENSG00000135905	2.25758	0.00195062303914735	0.0494714904029398	DOCK10	dedicator of cytokinesis 10 [Source:HGNC Symbol;Acc:HGNC:23479]
ENSG00000067057	2.26022	1.08803113516826e-12	3.20664536156788e-09	PFKP	phosphofructokinase, platelet [Source:HGNC Symbol;Acc:HGNC:8878]
ENSG00000109107	2.27508	1.14531691715585e-06	0.000344436532473646	ALDOC	aldolase, fructose-bisphosphate C [Source:HGNC Symbol;Acc:HGNC:418]
ENSG00000250320	2.28078	0.0014865785163116	0.0416468080159082	EDIL3-DT	EDIL3 divergent transcript [Source:HGNC Symbol;Acc:HGNC:40204]
ENSG00000107562	2.28145	1.11140353557373e-05	0.0018401845505859	CXCL12	C-X-C motif chemokine ligand 12 [Source:HGNC Symbol;Acc:HGNC:10672]
ENSG00000170989	2.30473	0.00135450623078929	0.0394466478595078	S1PR1	sphingosine-1-phosphate receptor 1 [Source:HGNC Symbol;Acc:HGNC:3165]
ENSG00000134107	2.31335	7.69531987424132e-10	1.03089303333473e-06	BHLHE40	basic helix-loop-helix family member e40 [Source:HGNC Symbol;Acc:HGNC:1046]
ENSG00000107796	2.31613	0.000517176979698799	0.0218370199794885	ACTA2	actin alpha 2, smooth muscle [Source:HGNC Symbol;Acc:HGNC:130]
ENSG00000151702	2.31695	0.00157052040046025	0.0432171913964653	FLI1	Fli-1 proto-oncogene, ETS transcription factor [Source:HGNC Symbol;Acc:HGNC:3749]
ENSG00000167780	2.36727	0.000252008540931771	0.0138051965024928	SOAT2	sterol O-acyltransferase 2 [Source:HGNC Symbol;Acc:HGNC:11178]
ENSG00000198121	2.36777	5.17563588172297e-05	0.00488898527904293	LPAR1	lysophosphatidic acid receptor 1 [Source:HGNC Symbol;Acc:HGNC:3166]
ENSG00000163364	2.38909	3.98925187373381e-05	0.00405418038698906	LINC01116	long intergenic non-protein coding RNA 1116 [Source:HGNC Symbol;Acc:HGNC:49259]
ENSG00000128656	2.42778	3.57444729175777e-06	0.000831512506117952	CHN1	chimerin 1 [Source:HGNC Symbol;Acc:HGNC:1943]
ENSG00000138829	2.47026	0.000991348660251596	0.0328281210280169	FBN2	fibrillin 2 [Source:HGNC Symbol;Acc:HGNC:3604]
ENSG00000166396	2.50931	1.57917594191901e-06	0.000456288954512127	SERPINB7	serpin family B member 7 [Source:HGNC Symbol;Acc:HGNC:13902]
ENSG00000263874	2.61141	0.000886848750976321	0.0309241048329751	LINC00672	long intergenic non-protein coding RNA 672 [Source:HGNC Symbol;Acc:HGNC:44353]
ENSG00000145244	2.62159	0.000367173321201448	0.0176626431204748	CORIN	corin, serine peptidase [Source:HGNC Symbol;Acc:HGNC:19012]
ENSG00000126785	2.65617	0.00131230235622158	0.0386761750425625	RHOJ	ras homolog family member J [Source:HGNC Symbol;Acc:HGNC:688]
ENSG00000137124	2.66022	4.5890150923866e-06	0.000980054005817521	ALDH1B1	aldehyde dehydrogenase 1 family member B1 [Source:HGNC Symbol;Acc:HGNC:407]
ENSG00000172137	2.68012	6.72348856937653e-07	0.000237533617139741	CALB2	calbindin 2 [Source:HGNC Symbol;Acc:HGNC:1435]
ENSG00000111087	2.68151	0.000658394584698971	0.0259414508024707	GLI1	GLI family zinc finger 1 [Source:HGNC Symbol;Acc:HGNC:4317]
ENSG00000072657	2.69937	0.000277423933070293	0.0148120256439269	TRHDE	thyrotropin releasing hormone degrading enzyme [Source:HGNC Symbol;Acc:HGNC:30748]
ENSG00000197747	2.76119	9.22908141045297e-11	1.69999679580544e-07	S100A10	S100 calcium binding protein A10 [Source:HGNC Symbol;Acc:HGNC:10487]
ENSG00000141052	2.78598	0.000559380820274824	0.022961102416629	MYOCD	myocardin [Source:HGNC Symbol;Acc:HGNC:16067]
ENSG00000136244	2.79363	8.53461665000713e-05	0.00676161886852178	IL6	interleukin 6 [Source:HGNC Symbol;Acc:HGNC:6018]
ENSG00000116574	2.79531	0.000209469619501938	0.0122977861074923	RHOU	ras homolog family member U [Source:HGNC Symbol;Acc:HGNC:17794]
ENSG00000145681	2.79772	0.00188228694714717	0.0486912920446937	HAPLN1	hyaluronan and proteoglycan link protein 1 [Source:HGNC Symbol;Acc:HGNC:2380]
ENSG00000186352	2.80069	4.86215492369738e-12	1.02355307079435e-08	ANKRD37	ankyrin repeat domain 37 [Source:HGNC Symbol;Acc:HGNC:29593]
ENSG00000272695	2.85121	2.67255009873616e-05	0.00340512786898851	GAS6-DT	GAS6 divergent transcript [Source:HGNC Symbol;Acc:HGNC:43694]
ENSG00000176171	2.85468	0.000101162872092736	0.00737988159979485	BNIP3	BCL2 interacting protein 3 [Source:HGNC Symbol;Acc:HGNC:1084]
ENSG00000168209	2.86594	3.38422544963461e-05	0.00384956537992448	DDIT4	DNA damage inducible transcript 4 [Source:HGNC Symbol;Acc:HGNC:24944]
ENSG00000115414	2.91334	2.02775986461801e-07	9.63905463387453e-05	FN1	fibronectin 1 [Source:HGNC Symbol;Acc:HGNC:3778]
ENSG00000138798	2.92708	0.000181429122064828	0.0110022203405239	EGF	epidermal growth factor [Source:HGNC Symbol;Acc:HGNC:3229]
ENSG00000172575	2.93039	0.00112650659490049	0.0358535662687982	RASGRP1	RAS guanyl releasing protein 1 [Source:HGNC Symbol;Acc:HGNC:9878]
ENSG00000164099	2.94952	0.00140439234036499	0.0401847097623659	PRSS12	serine protease 12 [Source:HGNC Symbol;Acc:HGNC:9477]
ENSG00000152256	2.96329	3.94375752487991e-10	6.45724565407004e-07	PDK1	pyruvate dehydrogenase kinase 1 [Source:HGNC Symbol;Acc:HGNC:8809]
ENSG00000123095	2.96608	0.00138551034317668	0.0399797505471866	BHLHE41	basic helix-loop-helix family member e41 [Source:HGNC Symbol;Acc:HGNC:16617]
ENSG00000261040	3.0135	0.00171340032541605	0.045990286330293	WFDC21P	WAP four-disulfide core domain 21, pseudogene [Source:HGNC Symbol;Acc:HGNC:50357]
ENSG00000274265	3.03337	0.000474316009599481	0.0204514901742078	None	novel transcript
ENSG00000236333	3.041	9.25549814748913e-05	0.00704380792664782	TRHDE-AS1	TRHDE antisense RNA 1 [Source:HGNC Symbol;Acc:HGNC:27471]
ENSG00000136542	3.07225	0.000742822386749209	0.0275686569395279	GALNT5	polypeptide N-acetylgalactosaminyltransferase 5 [Source:HGNC Symbol;Acc:HGNC:4127]
ENSG00000154310	3.08809	0.00136238542358107	0.0395653126947635	TNIK	TRAF2 and NCK interacting kinase [Source:HGNC Symbol;Acc:HGNC:30765]
ENSG00000139209	3.10093	0.000237990290339057	0.0132983506164787	SLC38A4	solute carrier family 38 member 4 [Source:HGNC Symbol;Acc:HGNC:14679]
ENSG00000196711	3.15344	0.000930628209959934	0.0319372883285714	ALKAL1	ALK and LTK ligand 1 [Source:HGNC Symbol;Acc:HGNC:33775]
ENSG00000175084	3.16554	0.000107526350164332	0.00758137940680187	DES	desmin [Source:HGNC Symbol;Acc:HGNC:2770]
ENSG00000159251	3.17271	5.74575085357887e-05	0.00510056533604447	ACTC1	actin alpha cardiac muscle 1 [Source:HGNC Symbol;Acc:HGNC:143]
ENSG00000046604	3.21791	0.00038248974777407	0.0180272309092029	DSG2	desmoglein 2 [Source:HGNC Symbol;Acc:HGNC:3049]
ENSG00000170624	3.24401	0.000170461635249892	0.0105542968783294	SGCD	sarcoglycan delta [Source:HGNC Symbol;Acc:HGNC:10807]
ENSG00000145147	3.25541	0.00156389671230221	0.0432171913964653	SLIT2	slit guidance ligand 2 [Source:HGNC Symbol;Acc:HGNC:11086]
ENSG00000117586	3.31689	0.000352591495481881	0.0172045969451026	TNFSF4	TNF superfamily member 4 [Source:HGNC Symbol;Acc:HGNC:11934]
ENSG00000157168	3.32067	6.53131310651457e-05	0.00553249452235105	NRG1	neuregulin 1 [Source:HGNC Symbol;Acc:HGNC:7997]
ENSG00000261150	3.34322	2.50045010711813e-05	0.00328987792665114	EPPK1	epiplakin 1 [Source:HGNC Symbol;Acc:HGNC:15577]
ENSG00000156463	3.34836	3.43556491884648e-05	0.00384956537992448	SH3RF2	SH3 domain containing ring finger 2 [Source:HGNC Symbol;Acc:HGNC:26299]
ENSG00000264230	3.40288	0.00168165118348924	0.0454581596094017	ANXA8L1	annexin A8 like 1 [Source:HGNC Symbol;Acc:HGNC:23334]
ENSG00000185652	3.41548	9.27319990343158e-05	0.00704380792664782	NTF3	neurotrophin 3 [Source:HGNC Symbol;Acc:HGNC:8023]
ENSG00000162433	3.52353	0.000240048945710053	0.0132983506164787	AK4	adenylate kinase 4 [Source:HGNC Symbol;Acc:HGNC:363]
ENSG00000155760	3.53303	0.00121050155762549	0.0371057048670937	FZD7	frizzled class receptor 7 [Source:HGNC Symbol;Acc:HGNC:4045]
ENSG00000233818	3.53687	0.00101694552603389	0.0333064444086176	CLDN14-AS1	CLDN14 antisense RNA 1 [Source:HGNC Symbol;Acc:HGNC:55953]
ENSG00000219607	3.5528	0.000418402187425469	0.019207397613401	PPP1R3G	protein phosphatase 1 regulatory subunit 3G [Source:HGNC Symbol;Acc:HGNC:14945]
ENSG00000169432	3.70285	0.000407452640774259	0.0187631941076546	SCN9A	sodium voltage-gated channel alpha subunit 9 [Source:HGNC Symbol;Acc:HGNC:10597]
ENSG00000115461	3.72751	4.08365464895445e-05	0.00410748426873012	IGFBP5	insulin like growth factor binding protein 5 [Source:HGNC Symbol;Acc:HGNC:5474]
ENSG00000139629	3.73105	5.49744108345438e-06	0.00110973002473676	GALNT6	polypeptide N-acetylgalactosaminyltransferase 6 [Source:HGNC Symbol;Acc:HGNC:4128]
ENSG00000174343	3.7441	0.000439814378767159	0.0195244153580053	CHRNA9	cholinergic receptor nicotinic alpha 9 subunit [Source:HGNC Symbol;Acc:HGNC:14079]
ENSG00000146250	3.7859	0.00125276159556517	0.0376244260742727	PRSS35	serine protease 35 [Source:HGNC Symbol;Acc:HGNC:21387]
ENSG00000291149	3.8589	0.0013200988611715	0.0388282970423617	None	novel transcript
ENSG00000226754	3.89577	0.000736907601514248	0.0275686569395279	MAGOH-DT	MAGOH divergent transcript [Source:HGNC Symbol;Acc:HGNC:49539]
ENSG00000040731	3.91254	0.000694630798836518	0.0269772809958854	CDH10	cadherin 10 [Source:HGNC Symbol;Acc:HGNC:1749]
ENSG00000145536	3.92129	0.00164749622518133	0.0447099528071309	ADAMTS16	ADAM metallopeptidase with thrombospondin type 1 motif 16 [Source:HGNC Symbol;Acc:HGNC:17108]
ENSG00000149506	3.92569	0.00136573894411365	0.0395653126947635	ZP1	zona pellucida glycoprotein 1 [Source:HGNC Symbol;Acc:HGNC:13187]
ENSG00000120708	3.94168	1.60507993435604e-20	2.36524579126706e-16	TGFBI	transforming growth factor beta induced [Source:HGNC Symbol;Acc:HGNC:11771]
ENSG00000182329	3.946	0.00158585380873714	0.0432171913964653	KIAA2012	KIAA2012 [Source:HGNC Symbol;Acc:HGNC:51250]
ENSG00000163017	4.00018	4.61157161662349e-05	0.00451090676189832	ACTG2	actin gamma 2, smooth muscle [Source:HGNC Symbol;Acc:HGNC:145]
ENSG00000142583	4.03976	5.34612483086916e-05	0.0049547481451376	SLC2A5	solute carrier family 2 member 5 [Source:HGNC Symbol;Acc:HGNC:11010]
ENSG00000133110	4.08786	0.00174050090651782	0.0465481331369266	POSTN	periostin [Source:HGNC Symbol;Acc:HGNC:16953]
ENSG00000260604	4.10209	0.000127913044268503	0.00854718673476724	None	novel transcript
ENSG00000150556	4.11537	0.00157445502083717	0.0432171913964653	LYPD6B	LY6/PLAUR domain containing 6B [Source:HGNC Symbol;Acc:HGNC:27018]
ENSG00000106772	4.11935	0.0015359751530887	0.0426254799546422	PRUNE2	prune homolog 2 with BCH domain [Source:HGNC Symbol;Acc:HGNC:25209]
ENSG00000247095	4.20113	6.96425838042058e-08	4.66478688608535e-05	MIR210HG	MIR210 host gene [Source:HGNC Symbol;Acc:HGNC:39524]
ENSG00000128422	4.2566	3.51299138038657e-05	0.00389228879559221	KRT17	keratin 17 [Source:HGNC Symbol;Acc:HGNC:6427]
ENSG00000105877	4.29621	0.00108491652491539	0.0347550650242461	DNAH11	dynein axonemal heavy chain 11 [Source:HGNC Symbol;Acc:HGNC:2942]
ENSG00000250742	4.36487	0.000877537506036752	0.0307158971234147	LINC02381	long intergenic non-protein coding RNA 2381 [Source:HGNC Symbol;Acc:HGNC:53304]
ENSG00000041982	4.37648	1.52239303493251e-08	1.43959810688203e-05	TNC	tenascin C [Source:HGNC Symbol;Acc:HGNC:5318]
ENSG00000197565	4.41506	0.00121318641608981	0.0371057048670937	COL4A6	collagen type IV alpha 6 chain [Source:HGNC Symbol;Acc:HGNC:2208]
ENSG00000162069	4.43579	0.00136663573300995	0.0395653126947635	BICDL2	BICD family like cargo adaptor 2 [Source:HGNC Symbol;Acc:HGNC:33584]
ENSG00000091490	4.50529	0.0019538821535363	0.0494714904029398	SEL1L3	SEL1L family member 3 [Source:HGNC Symbol;Acc:HGNC:29108]
ENSG00000107159	4.54939	4.14668213561163e-07	0.000156680789616341	CA9	carbonic anhydrase 9 [Source:HGNC Symbol;Acc:HGNC:1383]
ENSG00000233521	4.56796	0.00105315465093874	0.0340355224373719	LINC01638	long intergenic non-protein coding RNA 1638 [Source:HGNC Symbol;Acc:HGNC:52425]
ENSG00000230479	4.6939	0.000354013147145635	0.0172169562255382	None	novel transcript
ENSG00000171401	4.6994	0.000266767893238415	0.0144204715297493	KRT13	keratin 13 [Source:HGNC Symbol;Acc:HGNC:6415]
ENSG00000265107	4.72112	0.000374570358238366	0.0178053832225824	GJA5	gap junction protein alpha 5 [Source:HGNC Symbol;Acc:HGNC:4279]
ENSG00000164112	4.76058	0.00128061007337243	0.0382005466421379	SMIM43	small integral membrane protein 43 [Source:HGNC Symbol;Acc:HGNC:55077]
ENSG00000188517	4.83943	0.000634695446574486	0.0253465368583242	COL25A1	collagen type XXV alpha 1 chain [Source:HGNC Symbol;Acc:HGNC:18603]
ENSG00000124212	4.88757	0.000694759933602031	0.0269772809958854	PTGIS	prostaglandin I2 synthase [Source:HGNC Symbol;Acc:HGNC:9603]
ENSG00000133169	4.92758	0.000108651442812411	0.00758809318143927	BEX1	brain expressed X-linked 1 [Source:HGNC Symbol;Acc:HGNC:1036]
ENSG00000263535	4.94067	0.000225575940986315	0.0128840583967998	AK4P1	adenylate kinase 4 pseudogene 1 [Source:HGNC Symbol;Acc:HGNC:364]
ENSG00000225206	5.07673	0.000113101400561888	0.00786161433339617	MIR137HG	MIR137 host gene [Source:HGNC Symbol;Acc:HGNC:42871]
ENSG00000134198	5.18574	0.000954231548282341	0.0321774739027199	TSPAN2	tetraspanin 2 [Source:HGNC Symbol;Acc:HGNC:20659]
ENSG00000151892	5.25828	9.48627528823797e-05	0.00713213023711606	GFRA1	GDNF family receptor alpha 1 [Source:HGNC Symbol;Acc:HGNC:4243]
ENSG00000243955	5.69026	2.24967089173282e-05	0.00306955095005322	GSTA1	glutathione S-transferase alpha 1 [Source:HGNC Symbol;Acc:HGNC:4626]
ENSG00000178031	5.78288	1.7504363154497e-05	0.00260506683473708	ADAMTSL1	ADAMTS like 1 [Source:HGNC Symbol;Acc:HGNC:14632]
ENSG00000145934	5.84907	3.79898527329794e-05	0.0039919260010615	TENM2	teneurin transmembrane protein 2 [Source:HGNC Symbol;Acc:HGNC:29943]
ENSG00000178776	6.10064	1.13298745552663e-15	5.56523438154682e-12	C5orf46	chromosome 5 open reading frame 46 [Source:HGNC Symbol;Acc:HGNC:33768]
ENSG00000138395	6.32899	0.000442532215633399	0.0195244153580053	CDK15	cyclin dependent kinase 15 [Source:HGNC Symbol;Acc:HGNC:14434]
ENSG00000134259	6.95804	5.15046060212286e-05	0.00488898527904293	NGF	nerve growth factor [Source:HGNC Symbol;Acc:HGNC:7808]
ENSG00000154678	7.70843	0.000206565682852265	0.0122247064357871	PDE1C	phosphodiesterase 1C [Source:HGNC Symbol;Acc:HGNC:8776]
